# Supplementary material
Source: PubMed Central journal article supplement (PMC2818264)
Supplement: NIHMS151931-supplement-01.pdf [file NIHMS151931-supplement-01.pdf]

Prenatal and postnatal exposure to polychlorinated biphenyls and child size at 24 months of age

Leila W. Jackson, PhD, MPH<sup>1</sup>, Courtney D. Lynch, PhD, MPH<sup>2</sup>, Paul J. Kostyniak, PhD, DABT<sup>3</sup>,  
Bridget M. McGuinness, MS<sup>4</sup>, Germaine M. Buck Louis, PhD, MS<sup>5</sup>

## **Appendix**

Appendix Table 1. Congener-specific PCB concentrations (ng/g serum) in maternal prenatal serum, New York State Angler Cohort Study, 1996-2002.

|            | n  | median | minimum | Percentile |        | maximum | relative weight | % above LOD |
|------------|----|--------|---------|------------|--------|---------|-----------------|-------------|
|            |    |        |         | 25th       | 75th   |         |                 |             |
| pcb_4_10   | 44 | 0.0475 | 0.0000  | 0.0068     | 0.0735 | 0.1480  | 1.07%           | 0.00%       |
| pcb_5_8    | 44 | 0.1765 | 0.0320  | 0.1398     | 0.2050 | 0.2690  | 3.76%           | 72.73%      |
| pcb_6      | 44 | 0.0950 | 0.0000  | 0.0580     | 0.1233 | 0.1620  | 1.88%           | 4.55%       |
| pcb_7_9    | 44 | 0.0000 | 0.0000  | 0.0000     | 0.0108 | 0.0450  | 0.20%           | 6.82%       |
| pcb_15_17  | 44 | 0.1675 | 0.0920  | 0.1405     | 0.2073 | 0.2810  | 3.88%           | 77.27%      |
| pcb_16_32  | 44 | 0.1875 | 0.1210  | 0.1688     | 0.2230 | 0.3360  | 4.43%           | 54.55%      |
| pcb_18     | 44 | 0.2585 | 0.1610  | 0.2220     | 0.3257 | 0.4950  | 6.21%           | 59.09%      |
| pcb_19     | 44 | 0.0150 | 0.0000  | 0.0000     | 0.0505 | 0.1550  | 0.70%           | 15.91%      |
| pcb_22     | 44 | 0.1205 | 0.0548  | 0.0938     | 0.1525 | 0.2230  | 2.81%           | 54.55%      |
| pcb_24_27  | 44 | 0.0160 | 0.0000  | 0.0128     | 0.0212 | 0.0310  | 0.36%           | 40.91%      |
| pcb_25     | 44 | 0.0520 | 0.0250  | 0.0420     | 0.0600 | 0.1370  | 1.34%           | 13.64%      |
| pcb_28     | 44 | 0.1835 | 0.1097  | 0.1542     | 0.2503 | 0.3100  | 4.47%           | 97.73%      |
| pcb_31     | 44 | 0.1905 | 0.1170  | 0.1690     | 0.2577 | 0.3130  | 4.67%           | 97.73%      |
| pcb_33     | 44 | 0.1810 | 0.1172  | 0.1590     | 0.2435 | 0.3610  | 4.57%           | 65.91%      |
| pcb_40     | 44 | 0.0230 | 0.0110  | 0.0187     | 0.0285 | 0.0600  | 0.57%           | 47.73%      |
| pcb_42     | 44 | 0.0620 | 0.0320  | 0.0520     | 0.0767 | 0.1590  | 1.52%           | 79.55%      |
| pcb_44     | 44 | 0.0970 | 0.0620  | 0.0858     | 0.1363 | 0.2570  | 2.65%           | 25.00%      |
| pcb_45     | 44 | 0.0315 | 0.0200  | 0.0280     | 0.0375 | 0.1110  | 0.84%           | 47.73%      |
| pcb_47     | 44 | 0.1375 | 0.0470  | 0.0932     | 0.1623 | 0.3410  | 3.13%           | 22.73%      |
| pcb_48     | 44 | 0.0210 | 0.0000  | 0.0138     | 0.0273 | 0.1130  | 0.63%           | 18.18%      |
| pcb_52     | 44 | 0.0965 | 0.0570  | 0.0805     | 0.1417 | 0.2590  | 2.52%           | 34.09%      |
| pcb_55     | 44 | 0.0070 | 0.0000  | 0.0059     | 0.0102 | 0.0350  | 0.22%           | 93.18%      |
| pcb_59     | 44 | 0.0080 | 0.0000  | 0.0058     | 0.0100 | 0.0160  | 0.17%           | 2.27%       |
| pcb_60     | 44 | 0.0640 | 0.0080  | 0.0560     | 0.0795 | 0.1980  | 1.66%           | 34.09%      |
| pcb_64     | 44 | 0.0720 | 0.0290  | 0.0585     | 0.0893 | 0.1340  | 1.66%           | 88.64%      |
| pcb_66_95  | 44 | 0.2205 | 0.1347  | 0.1905     | 0.2890 | 0.6240  | 5.87%           | 59.09%      |
| pcb_70     | 44 | 0.0695 | 0.0380  | 0.0572     | 0.0955 | 0.2060  | 1.83%           | 95.45%      |
| pcb_74     | 44 | 0.0785 | 0.0440  | 0.0685     | 0.1050 | 0.1900  | 1.99%           | 9.09%       |
| pcb_77_110 | 44 | 0.0310 | 0.0170  | 0.0240     | 0.0433 | 0.1380  | 0.89%           | 61.36%      |
| pcb_81_87  | 44 | 0.0185 | 0.0090  | 0.0138     | 0.0243 | 0.0890  | 0.49%           | 95.45%      |
| pcb_82     | 44 | 0.0020 | 0.0000  | 0.0013     | 0.0033 | 0.0410  | 0.09%           | 20.45%      |
| pcb_94     | 44 | 0.0010 | 0.0000  | 0.0000     | 0.0090 | 0.0170  | 0.09%           | 15.91%      |
| pcb_97     | 44 | 0.0120 | 0.0030  | 0.0068     | 0.0165 | 0.0340  | 0.29%           | 70.45%      |
| pcb_99     | 44 | 0.0540 | 0.0293  | 0.0465     | 0.0675 | 0.1100  | 1.27%           | 100.00%     |
| pcb_101    | 44 | 0.1055 | 0.0670  | 0.0850     | 0.1505 | 0.2210  | 2.65%           | 29.55%      |
| pcb_105    | 44 | 0.0120 | 0.0060  | 0.0090     | 0.0175 | 0.0720  | 0.33%           | 72.73%      |
| pcb_114    | 44 | 0.0060 | 0.0000  | 0.0040     | 0.0073 | 0.0200  | 0.13%           | 79.55%      |
| pcb_118    | 44 | 0.0705 | 0.0450  | 0.0600     | 0.0842 | 0.2370  | 1.79%           | 100.00%     |
| pcb_126    | 44 | 0.0140 | 0.0000  | 0.0100     | 0.0212 | 0.0420  | 0.38%           | 47.73%      |
| pcb_128    | 44 | 0.0065 | 0.0000  | 0.0040     | 0.0083 | 0.0280  | 0.15%           | 56.82%      |
| pcb_129    | 44 | 0.0025 | 0.0000  | 0.0000     | 0.0040 | 0.0350  | 0.08%           | 68.18%      |
| pcb_132    | 44 | 0.0150 | 0.0070  | 0.0100     | 0.0192 | 0.0710  | 0.39%           | 52.27%      |

|             |    |        |        |        |        |        |       |         |
|-------------|----|--------|--------|--------|--------|--------|-------|---------|
| pcb_134     | 44 | 0.0020 | 0.0000 | 0.0020 | 0.0030 | 0.0090 | 0.06% | 6.82%   |
| pcb_135     | 44 | 0.0190 | 0.0000 | 0.0159 | 0.0260 | 0.1080 | 0.56% | 61.36%  |
| pcb_136     | 44 | 0.0270 | 0.0150 | 0.0210 | 0.0372 | 0.1450 | 0.80% | 59.09%  |
| pcb_138     | 44 | 0.1875 | 0.0940 | 0.1655 | 0.2147 | 0.4790 | 4.49% | 97.73%  |
| pcb_141     | 44 | 0.0090 | 0.0050 | 0.0070 | 0.0143 | 0.0520 | 0.28% | 31.82%  |
| pcb_147     | 44 | 0.0020 | 0.0000 | 0.0020 | 0.0030 | 0.0150 | 0.07% | 77.27%  |
| pcb_149     | 44 | 0.0640 | 0.0360 | 0.0490 | 0.0862 | 0.3700 | 1.90% | 50.00%  |
| pcb_153     | 44 | 0.2400 | 0.1200 | 0.2117 | 0.2787 | 0.5400 | 5.68% | 100.00% |
| pcb_156_171 | 44 | 0.0390 | 0.0140 | 0.0305 | 0.0527 | 0.1360 | 1.00% | 100.00% |
| pcb_157_200 | 44 | 0.0040 | 0.0000 | 0.0028 | 0.0070 | 0.0170 | 0.11% | 72.73%  |
| pcb_163     | 44 | 0.0000 | 0.0000 | 0.0000 | 0.0000 | 0.0010 | 0.00% | 6.82%   |
| pcb_167     | 44 | 0.0060 | 0.0000 | 0.0047 | 0.0083 | 0.0360 | 0.16% | 95.45%  |
| pcb_169     | 44 | 0.0000 | 0.0000 | 0.0000 | 0.0010 | 0.0120 | 0.01% | 27.27%  |
| pcb_170     | 44 | 0.0405 | 0.0140 | 0.0318 | 0.0510 | 0.1350 | 1.00% | 97.73%  |
| pcb_172     | 44 | 0.0070 | 0.0000 | 0.0055 | 0.0092 | 0.0210 | 0.16% | 38.64%  |
| pcb_174     | 44 | 0.0100 | 0.0050 | 0.0070 | 0.0200 | 0.0500 | 0.31% | 36.36%  |
| pcb_176     | 44 | 0.0145 | 0.0000 | 0.0078 | 0.0225 | 0.1220 | 0.43% | 18.18%  |
| pcb_177     | 44 | 0.0090 | 0.0050 | 0.0078 | 0.0143 | 0.0820 | 0.30% | 93.18%  |
| pcb_179     | 44 | 0.0195 | 0.0100 | 0.0160 | 0.0263 | 0.0880 | 0.54% | 63.64%  |
| pcb_180     | 44 | 0.1315 | 0.0480 | 0.1055 | 0.1623 | 0.2970 | 3.15% | 100.00% |
| pcb_181     | 44 | 0.0030 | 0.0000 | 0.0020 | 0.0040 | 0.0080 | 0.07% | 31.82%  |
| pcb_183     | 44 | 0.0130 | 0.0070 | 0.0100 | 0.0173 | 0.0470 | 0.34% | 95.45%  |
| pcb_185     | 44 | 0.0030 | 0.0000 | 0.0012 | 0.0050 | 0.0130 | 0.08% | 38.64%  |
| pcb_187     | 44 | 0.0685 | 0.0380 | 0.0561 | 0.0933 | 0.1400 | 1.72% | 97.73%  |
| pcb_188     | 44 | 0.0200 | 0.0040 | 0.0140 | 0.0243 | 0.0980 | 0.47% | 77.27%  |
| pcb_189     | 44 | 0.0010 | 0.0000 | 0.0000 | 0.0010 | 0.0040 | 0.02% | 59.09%  |
| pcb_190     | 44 | 0.0000 | 0.0000 | 0.0000 | 0.0023 | 0.0120 | 0.03% | 20.45%  |
| pcb_194     | 44 | 0.0100 | 0.0040 | 0.0080 | 0.0160 | 0.0620 | 0.30% | 100.00% |
| pcb_195     | 44 | 0.0040 | 0.0000 | 0.0025 | 0.0054 | 0.0430 | 0.11% | 75.00%  |
| pcb_196_203 | 44 | 0.0180 | 0.0060 | 0.0140 | 0.0280 | 0.1190 | 0.54% | 100.00% |
| pcb_205     | 44 | 0.0000 | 0.0000 | 0.0000 | 0.0010 | 0.0040 | 0.01% | 43.18%  |
| pcb_206     | 44 | 0.0190 | 0.0000 | 0.0130 | 0.0300 | 0.2590 | 0.65% | 90.91%  |

Appendix Table 2. Congener-specific PCB concentrations (ng/g lipid) in maternal prenatal serum, New York State Angler Cohort Study, 1996-2002.

|            | n  | median  | minimum | Percentile |         | maximum  | relative weight |
|------------|----|---------|---------|------------|---------|----------|-----------------|
|            |    |         |         | 25th       | 75th    |          |                 |
| pcb_4_10   | 41 | 12.2120 | 0.0000  | 1.7199     | 16.5085 | 31.6916  | 0.97%           |
| pcb_5_8    | 41 | 39.2377 | 9.3294  | 30.2222    | 55.2553 | 80.7692  | 3.58%           |
| pcb_6      | 41 | 21.1180 | 0.0000  | 13.2353    | 30.3901 | 52.7687  | 1.81%           |
| pcb_7_9    | 41 | 0.0000  | 0.0000  | 0.0000     | 0.8746  | 11.0565  | 0.16%           |
| pcb_15_17  | 41 | 44.4444 | 11.7554 | 33.5277    | 54.2088 | 95.9559  | 3.81%           |
| pcb_16_32  | 41 | 50.9839 | 14.2176 | 37.5770    | 62.7119 | 120.9559 | 4.40%           |
| pcb_18     | 41 | 66.1491 | 18.8245 | 52.5667    | 81.1321 | 163.2353 | 6.09%           |
| pcb_19     | 41 | 4.5274  | 0.0000  | 0.0000     | 12.1951 | 46.5465  | 0.72%           |
| pcb_22     | 41 | 30.4348 | 11.6190 | 21.9802    | 41.6667 | 68.7919  | 2.80%           |
| pcb_24_27  | 41 | 4.0254  | 0.0000  | 2.8889     | 6.0377  | 11.3971  | 0.38%           |
| pcb_25     | 41 | 13.8107 | 4.2097  | 10.0569    | 19.1983 | 45.8333  | 1.39%           |
| pcb_28     | 41 | 49.7317 | 13.3439 | 36.2288    | 71.1370 | 113.8577 | 4.50%           |
| pcb_31     | 41 | 51.0145 | 14.4559 | 38.9952    | 72.3127 | 114.7059 | 4.74%           |
| pcb_33     | 41 | 48.3005 | 13.1056 | 35.2018    | 66.4495 | 124.2647 | 4.66%           |
| pcb_40     | 41 | 6.1381  | 1.5091  | 4.2601     | 8.4112  | 17.4927  | 0.59%           |
| pcb_42     | 41 | 16.9492 | 4.0508  | 11.8182    | 22.6866 | 46.3557  | 1.58%           |
| pcb_44     | 41 | 27.3292 | 6.8308  | 18.2222    | 39.7015 | 90.2622  | 2.76%           |
| pcb_45     | 41 | 8.7282  | 2.3034  | 6.4593     | 10.7477 | 37.2483  | 0.87%           |
| pcb_47     | 41 | 31.9202 | 7.5457  | 23.9089    | 47.5525 | 113.4831 | 3.21%           |
| pcb_48     | 41 | 4.7727  | 0.0000  | 2.7027     | 8.0882  | 34.4569  | 0.67%           |
| pcb_52     | 41 | 25.0616 | 5.7188  | 18.8636    | 35.1792 | 78.5235  | 2.60%           |
| pcb_55     | 41 | 2.1021  | 0.3971  | 1.4311     | 3.3088  | 7.1161   | 0.23%           |
| pcb_59     | 41 | 2.0000  | 0.0000  | 1.4831     | 2.9155  | 4.6377   | 0.18%           |
| pcb_60     | 41 | 16.4596 | 2.5641  | 12.2056    | 23.9067 | 57.7259  | 1.73%           |
| pcb_64     | 41 | 18.3616 | 4.6863  | 13.2287    | 26.8657 | 46.4419  | 1.73%           |
| pcb_66_95  | 41 | 61.8012 | 14.7736 | 41.7323    | 83.5017 | 181.9242 | 6.16%           |
| pcb_70     | 41 | 19.5652 | 4.2891  | 13.1890    | 27.1642 | 60.0583  | 1.91%           |
| pcb_74     | 41 | 23.7237 | 5.3217  | 15.0424    | 30.4668 | 53.2075  | 2.03%           |
| pcb_77_110 | 41 | 8.4548  | 1.9857  | 5.8824     | 12.5373 | 38.8406  | 0.86%           |
| pcb_81_87  | 41 | 4.9528  | 0.9531  | 3.3632     | 7.1161  | 22.6087  | 0.50%           |
| pcb_82     | 41 | 0.4914  | 0.0000  | 0.3106     | 0.8746  | 11.8841  | 0.09%           |
| pcb_94     | 41 | 0.2915  | 0.0000  | 0.0000     | 2.1782  | 4.3624   | 0.09%           |
| pcb_97     | 41 | 3.0374  | 0.5560  | 1.5873     | 4.4811  | 9.8551   | 0.28%           |
| pcb_99     | 41 | 14.7668 | 4.2097  | 11.7778    | 19.5440 | 27.0270  | 1.27%           |
| pcb_101    | 41 | 30.4668 | 7.1485  | 19.3182    | 40.4040 | 76.0417  | 2.70%           |
| pcb_105    | 41 | 3.1818  | 0.5560  | 2.2444     | 4.4304  | 17.2249  | 0.31%           |
| pcb_114    | 41 | 1.4963  | 0.0000  | 1.0067     | 2.0408  | 4.7847   | 0.12%           |
| pcb_118    | 41 | 18.9189 | 5.0834  | 14.8338    | 26.3889 | 55.3738  | 1.72%           |
| pcb_126    | 41 | 3.9088  | 0.9531  | 2.3585     | 5.6962  | 11.5385  | 0.38%           |
| pcb_128    | 41 | 1.6026  | 0.0000  | 0.9901     | 2.6834  | 6.6986   | 0.16%           |
| pcb_129    | 41 | 0.6006  | 0.0000  | 0.0000     | 1.1236  | 6.9307   | 0.07%           |
| pcb_132    | 41 | 3.4091  | 0.9531  | 2.5424     | 5.0746  | 17.3913  | 0.39%           |

|             |    |         |         |         |         |          |       |
|-------------|----|---------|---------|---------|---------|----------|-------|
| pcb_134     | 41 | 0.6006  | 0.0000  | 0.3795  | 1.0067  | 2.6087   | 0.06% |
| pcb_135     | 41 | 4.9689  | 1.4297  | 3.8544  | 7.7612  | 29.8551  | 0.57% |
| pcb_136     | 41 | 7.4766  | 1.5886  | 4.9763  | 10.1493 | 42.0290  | 0.79% |
| pcb_138     | 41 | 49.9106 | 17.2359 | 37.9507 | 64.1944 | 117.6904 | 4.41% |
| pcb_141     | 41 | 2.1739  | 0.7149  | 1.6949  | 3.8806  | 12.4638  | 0.27% |
| pcb_147     | 41 | 0.5367  | 0.0000  | 0.3937  | 0.8565  | 3.8860   | 0.06% |
| pcb_149     | 41 | 15.6352 | 4.6068  | 12.1442 | 24.7761 | 103.7681 | 1.88% |
| pcb_153     | 41 | 64.7585 | 23.5107 | 48.0076 | 80.5699 | 132.6781 | 5.60% |
| pcb_156_171 | 41 | 10.4027 | 3.3465  | 7.5975  | 13.7441 | 33.4152  | 0.97% |
| pcb_157_200 | 41 | 0.9317  | 0.0000  | 0.4717  | 1.4831  | 4.0670   | 0.09% |
| pcb_163     | 41 | 0.0000  | 0.0000  | 0.0000  | 0.0000  | 0.3205   | 0.00% |
| pcb_167     | 41 | 1.6129  | 0.0000  | 0.9479  | 2.1021  | 3.1941   | 0.12% |
| pcb_169     | 41 | 0.0000  | 0.0000  | 0.0000  | 0.2141  | 3.5821   | 0.01% |
| pcb_170     | 41 | 10.9005 | 3.1390  | 7.7088  | 14.8688 | 27.0270  | 0.96% |
| pcb_172     | 41 | 1.8957  | 0.0000  | 0.9615  | 2.5907  | 5.2448   | 0.14% |
| pcb_174     | 41 | 2.3256  | 0.7149  | 1.7717  | 4.2194  | 11.9617  | 0.30% |
| pcb_176     | 41 | 3.6855  | 0.0000  | 1.7717  | 5.8309  | 11.4833  | 0.35% |
| pcb_177     | 41 | 2.5000  | 0.7943  | 1.8433  | 4.3624  | 19.6172  | 0.30% |
| pcb_179     | 41 | 4.9140  | 1.5091  | 3.7402  | 6.8657  | 22.8986  | 0.53% |
| pcb_180     | 41 | 35.0711 | 10.7623 | 25.5981 | 42.9907 | 91.2588  | 3.07% |
| pcb_181     | 41 | 0.7075  | 0.0000  | 0.5693  | 1.1029  | 2.9963   | 0.07% |
| pcb_183     | 41 | 3.2520  | 1.0326  | 2.3585  | 5.0336  | 11.2440  | 0.32% |
| pcb_185     | 41 | 0.7481  | 0.0000  | 0.3177  | 1.3550  | 3.7681   | 0.08% |
| pcb_187     | 41 | 19.1388 | 5.3217  | 12.9717 | 27.3016 | 48.9510  | 1.72% |
| pcb_188     | 41 | 4.9689  | 0.8214  | 3.3333  | 7.0093  | 23.4450  | 0.45% |
| pcb_189     | 41 | 0.2053  | 0.0000  | 0.0000  | 0.2899  | 0.7371   | 0.01% |
| pcb_190     | 41 | 0.0000  | 0.0000  | 0.0000  | 0.0000  | 2.1531   | 0.03% |
| pcb_194     | 41 | 2.4390  | 0.8969  | 2.0134  | 3.1941  | 19.2547  | 0.28% |
| pcb_195     | 41 | 1.0230  | 0.0000  | 0.5906  | 1.4981  | 13.3540  | 0.12% |
| pcb_196_203 | 41 | 4.6980  | 1.3453  | 3.5047  | 6.2500  | 36.9565  | 0.53% |
| pcb_205     | 41 | 0.0000  | 0.0000  | 0.0000  | 0.2558  | 1.1662   | 0.02% |
| pcb_206     | 41 | 4.7619  | 0.0000  | 3.4783  | 7.5802  | 80.4348  | 0.69% |

Appendix Table 3. Congener-specific PCB concentrations (ng/g milk) in breast milk, New York State Angler Cohort Study, 1996-2002.

|              | n  | median | minimum | Percentile |        | maximum | relative weight | % above LOD |
|--------------|----|--------|---------|------------|--------|---------|-----------------|-------------|
|              |    |        |         | 25th       | 75th   |         |                 |             |
| PCB 1        | 30 | 0.0003 | 0.0001  | 0.0002     | 0.0004 | 0.0118  | 0.02%           | 100.00%     |
| PCB 2        | 30 | 0.0001 | 0.0000  | 0.0000     | 0.0001 | 0.0017  | 0.00%           | 96.88%      |
| PCB 3        | 30 | 0.0003 | 0.0001  | 0.0001     | 0.0004 | 0.0059  | 0.01%           | 100.00%     |
| PCB 4        | 32 | 0.0005 | 0.0002  | 0.0003     | 0.0008 | 0.0150  | 0.02%           | 100.00%     |
| PCB 5        | 32 | 0.0001 | 0.0000  | 0.0000     | 0.0001 | 0.0017  | 0.00%           | 31.25%      |
| PCB 6        | 32 | 0.0003 | 0.0001  | 0.0002     | 0.0005 | 0.0082  | 0.01%           | 96.88%      |
| PCB 7        | 32 | 0.0001 | 0.0000  | 0.0001     | 0.0003 | 0.0072  | 0.01%           | 71.88%      |
| PCB 8        | 32 | 0.0010 | 0.0003  | 0.0007     | 0.0017 | 0.0356  | 0.05%           | 100.00%     |
| PCB 9        | 32 | 0.0001 | 0.0001  | 0.0001     | 0.0002 | 0.0038  | 0.01%           | 78.13%      |
| PCB 10       | 32 | 0.0001 | 0.0000  | 0.0000     | 0.0001 | 0.0017  | 0.00%           | 6.25%       |
| PCB 11       | 32 | 0.0011 | 0.0004  | 0.0007     | 0.0016 | 0.0188  | 0.04%           | 100.00%     |
| PCB 12_13    | 32 | 0.0001 | 0.0000  | 0.0001     | 0.0002 | 0.0049  | 0.01%           | 50.00%      |
| PCB 14       | 32 | 0.0001 | 0.0000  | 0.0000     | 0.0001 | 0.0017  | 0.00%           | 0.00%       |
| PCB 15       | 32 | 0.0004 | 0.0001  | 0.0003     | 0.0006 | 0.0165  | 0.02%           | 100.00%     |
| PCB 16       | 32 | 0.0004 | 0.0002  | 0.0003     | 0.0007 | 0.0151  | 0.02%           | 100.00%     |
| PCB 17       | 32 | 0.0004 | 0.0001  | 0.0003     | 0.0007 | 0.0154  | 0.02%           | 100.00%     |
| PCB 18_30    | 32 | 0.0009 | 0.0003  | 0.0007     | 0.0020 | 0.0307  | 0.05%           | 100.00%     |
| PCB 19       | 32 | 0.0001 | 0.0000  | 0.0001     | 0.0002 | 0.0035  | 0.01%           | 100.00%     |
| PCB 20_28    | 32 | 0.0807 | 0.0108  | 0.0591     | 0.1542 | 0.2770  | 1.87%           | 100.00%     |
| PCB 21_33    | 32 | 0.0015 | 0.0003  | 0.0010     | 0.0025 | 0.0258  | 0.05%           | 100.00%     |
| PCB 22       | 32 | 0.0006 | 0.0002  | 0.0004     | 0.0011 | 0.0144  | 0.02%           | 100.00%     |
| PCB 23       | 32 | 0.0000 | 0.0000  | 0.0000     | 0.0000 | 0.0017  | 0.00%           | 0.00%       |
| PCB 24       | 32 | 0.0000 | 0.0000  | 0.0000     | 0.0000 | 0.0017  | 0.00%           | 53.13%      |
| PCB 25       | 32 | 0.0001 | 0.0000  | 0.0001     | 0.0002 | 0.0029  | 0.00%           | 96.88%      |
| PCB 26_29    | 32 | 0.0004 | 0.0001  | 0.0003     | 0.0006 | 0.0081  | 0.01%           | 100.00%     |
| PCB 27       | 32 | 0.0001 | 0.0000  | 0.0000     | 0.0001 | 0.0021  | 0.00%           | 96.88%      |
| PCB 31       | 32 | 0.0023 | 0.0005  | 0.0018     | 0.0047 | 0.0364  | 0.08%           | 100.00%     |
| PCB 32       | 32 | 0.0003 | 0.0001  | 0.0002     | 0.0005 | 0.0091  | 0.01%           | 100.00%     |
| PCB 34       | 32 | 0.0000 | 0.0000  | 0.0000     | 0.0000 | 0.0017  | 0.00%           | 3.13%       |
| PCB 35       | 32 | 0.0000 | 0.0000  | 0.0000     | 0.0000 | 0.0017  | 0.00%           | 34.38%      |
| PCB 36       | 32 | 0.0000 | 0.0000  | 0.0000     | 0.0000 | 0.0017  | 0.00%           | 0.00%       |
| PCB 37       | 32 | 0.0003 | 0.0001  | 0.0002     | 0.0005 | 0.0061  | 0.01%           | 100.00%     |
| PCB 38       | 32 | 0.0000 | 0.0000  | 0.0000     | 0.0000 | 0.0017  | 0.00%           | 0.00%       |
| PCB 39       | 32 | 0.0000 | 0.0000  | 0.0000     | 0.0000 | 0.0017  | 0.00%           | 0.00%       |
| PCB 40_41_71 | 32 | 0.0007 | 0.0002  | 0.0005     | 0.0017 | 0.0111  | 0.03%           | 100.00%     |
| PCB 42       | 32 | 0.0005 | 0.0001  | 0.0003     | 0.0009 | 0.0048  | 0.02%           | 100.00%     |
| PCB 43       | 32 | 0.0000 | 0.0000  | 0.0000     | 0.0001 | 0.0017  | 0.00%           | 53.13%      |
| PCB 44_47_65 | 32 | 0.0094 | 0.0020  | 0.0047     | 0.0177 | 0.0473  | 0.23%           | 100.00%     |
| PCB 45_51    | 32 | 0.0002 | 0.0001  | 0.0001     | 0.0003 | 0.0057  | 0.01%           | 100.00%     |
| PCB 46       | 32 | 0.0000 | 0.0000  | 0.0000     | 0.0001 | 0.0017  | 0.00%           | 87.50%      |
| PCB 48       | 32 | 0.0001 | 0.0000  | 0.0001     | 0.0003 | 0.0057  | 0.01%           | 100.00%     |
| PCB 49_69    | 32 | 0.0015 | 0.0003  | 0.0010     | 0.0036 | 0.0135  | 0.05%           | 100.00%     |

|                          |    |        |        |        |        |        |       |         |
|--------------------------|----|--------|--------|--------|--------|--------|-------|---------|
| PCB 50_53                | 32 | 0.0002 | 0.0000 | 0.0001 | 0.0003 | 0.0050 | 0.01% | 100.00% |
| PCB 52                   | 32 | 0.0082 | 0.0012 | 0.0055 | 0.0221 | 0.0725 | 0.28% | 100.00% |
| PCB 54                   | 32 | 0.0000 | 0.0000 | 0.0000 | 0.0000 | 0.0017 | 0.00% | 21.88%  |
| PCB 55                   | 32 | 0.0001 | 0.0000 | 0.0001 | 0.0002 | 0.0028 | 0.00% | 0.00%   |
| PCB 56                   | 32 | 0.0003 | 0.0001 | 0.0002 | 0.0006 | 0.0039 | 0.01% | 90.63%  |
| PCB 57                   | 32 | 0.0001 | 0.0000 | 0.0001 | 0.0001 | 0.0028 | 0.00% | 0.00%   |
| PCB 58                   | 32 | 0.0001 | 0.0000 | 0.0001 | 0.0001 | 0.0028 | 0.00% | 0.00%   |
| PCB 59_62_75             | 32 | 0.0007 | 0.0000 | 0.0004 | 0.0012 | 0.0025 | 0.02% | 96.88%  |
| PCB 60                   | 32 | 0.0184 | 0.0029 | 0.0140 | 0.0354 | 0.0641 | 0.42% | 100.00% |
| PCB 61_70_74_76          | 32 | 0.2985 | 0.0457 | 0.2307 | 0.3780 | 0.8850 | 6.03% | 100.00% |
| PCB 63                   | 32 | 0.0015 | 0.0002 | 0.0012 | 0.0029 | 0.0055 | 0.03% | 100.00% |
| PCB 64                   | 32 | 0.0016 | 0.0003 | 0.0009 | 0.0031 | 0.0105 | 0.05% | 100.00% |
| PCB 66                   | 32 | 0.0484 | 0.0073 | 0.0374 | 0.1080 | 0.1950 | 1.18% | 100.00% |
| PCB 67                   | 32 | 0.0001 | 0.0000 | 0.0001 | 0.0001 | 0.0025 | 0.00% | 0.00%   |
| PCB 68                   | 32 | 0.0003 | 0.0001 | 0.0002 | 0.0004 | 0.0026 | 0.01% | 96.88%  |
| PCB 72                   | 32 | 0.0001 | 0.0000 | 0.0001 | 0.0001 | 0.0027 | 0.00% | 0.00%   |
| PCB 73                   | 32 | 0.0000 | 0.0000 | 0.0000 | 0.0000 | 0.0017 | 0.00% | 21.88%  |
| PCB 77                   | 32 | 0.0002 | 0.0000 | 0.0001 | 0.0003 | 0.0032 | 0.01% | 93.75%  |
| PCB 78                   | 32 | 0.0001 | 0.0000 | 0.0001 | 0.0003 | 0.0030 | 0.00% | 21.88%  |
| PCB 79                   | 32 | 0.0001 | 0.0000 | 0.0000 | 0.0002 | 0.0023 | 0.00% | 18.75%  |
| PCB 80                   | 32 | 0.0001 | 0.0000 | 0.0001 | 0.0001 | 0.0026 | 0.00% | 0.00%   |
| PCB 81                   | 32 | 0.0003 | 0.0000 | 0.0002 | 0.0005 | 0.0031 | 0.01% | 87.50%  |
| PCB 82                   | 32 | 0.0003 | 0.0001 | 0.0002 | 0.0007 | 0.0086 | 0.02% | 90.63%  |
| PCB 83_99                | 32 | 0.3080 | 0.0536 | 0.2133 | 0.4090 | 0.9800 | 5.75% | 100.00% |
| PCB 84                   | 32 | 0.0008 | 0.0001 | 0.0005 | 0.0018 | 0.0219 | 0.04% | 96.88%  |
| PCB 85_116_117           | 32 | 0.0141 | 0.0014 | 0.0102 | 0.0266 | 0.0754 | 0.36% | 100.00% |
| PCB 86_87_97_108_119_125 | 32 | 0.0040 | 0.0006 | 0.0021 | 0.0079 | 0.0738 | 0.15% | 96.88%  |
| PCB 88_91                | 32 | 0.0004 | 0.0001 | 0.0002 | 0.0009 | 0.0107 | 0.02% | 96.88%  |
| PCB 89                   | 32 | 0.0001 | 0.0000 | 0.0000 | 0.0001 | 0.0048 | 0.00% | 3.13%   |
| PCB 90_101_113           | 32 | 0.0157 | 0.0017 | 0.0106 | 0.0322 | 0.1500 | 0.51% | 100.00% |
| PCB 92                   | 32 | 0.0063 | 0.0004 | 0.0042 | 0.0111 | 0.0480 | 0.18% | 96.88%  |
| PCB 93_95_98_100_102     | 32 | 0.0093 | 0.0013 | 0.0060 | 0.0189 | 0.1200 | 0.32% | 100.00% |
| PCB 94                   | 32 | 0.0001 | 0.0000 | 0.0000 | 0.0001 | 0.0047 | 0.00% | 0.00%   |
| PCB 96                   | 32 | 0.0000 | 0.0000 | 0.0000 | 0.0000 | 0.0017 | 0.00% | 40.63%  |
| PCB 103                  | 32 | 0.0001 | 0.0000 | 0.0000 | 0.0001 | 0.0040 | 0.00% | 21.88%  |
| PCB 104                  | 32 | 0.0000 | 0.0000 | 0.0000 | 0.0000 | 0.0017 | 0.00% | 6.25%   |
| PCB 105                  | 32 | 0.0932 | 0.0168 | 0.0717 | 0.1405 | 0.3300 | 2.19% | 100.00% |
| PCB 106                  | 32 | 0.0003 | 0.0001 | 0.0002 | 0.0006 | 0.0065 | 0.01% | 0.00%   |
| PCB 107_124              | 32 | 0.0004 | 0.0001 | 0.0002 | 0.0008 | 0.0070 | 0.01% | 18.75%  |
| PCB 109                  | 32 | 0.0083 | 0.0008 | 0.0061 | 0.0134 | 0.0387 | 0.20% | 96.88%  |
| PCB 110_115              | 32 | 0.0131 | 0.0019 | 0.0084 | 0.0226 | 0.1860 | 0.42% | 100.00% |
| PCB 111                  | 32 | 0.0004 | 0.0001 | 0.0003 | 0.0006 | 0.0036 | 0.01% | 93.75%  |
| PCB 112                  | 32 | 0.0000 | 0.0000 | 0.0000 | 0.0001 | 0.0035 | 0.00% | 0.00%   |
| PCB 114                  | 32 | 0.0266 | 0.0069 | 0.0227 | 0.0360 | 0.1060 | 0.61% | 100.00% |
| PCB 118                  | 32 | 0.3785 | 0.0815 | 0.2928 | 0.5605 | 1.3600 | 8.69% | 100.00% |
| PCB 120                  | 32 | 0.0003 | 0.0000 | 0.0002 | 0.0004 | 0.0037 | 0.01% | 87.50%  |

|                     |    |        |        |        |        |        |        |         |
|---------------------|----|--------|--------|--------|--------|--------|--------|---------|
| PCB 121             | 32 | 0.0001 | 0.0000 | 0.0001 | 0.0002 | 0.0035 | 0.01%  | 84.38%  |
| PCB 122             | 32 | 0.0004 | 0.0001 | 0.0002 | 0.0007 | 0.0077 | 0.01%  | 0.00%   |
| PCB 123             | 32 | 0.0073 | 0.0019 | 0.0048 | 0.0119 | 0.0426 | 0.17%  | 96.88%  |
| PCB 126             | 32 | 0.0010 | 0.0002 | 0.0006 | 0.0013 | 0.0081 | 0.02%  | 81.25%  |
| PCB 127             | 32 | 0.0006 | 0.0001 | 0.0003 | 0.0019 | 0.0074 | 0.02%  | 37.50%  |
| PCB 128_166         | 32 | 0.0140 | 0.0024 | 0.0081 | 0.0208 | 0.0610 | 0.28%  | 100.00% |
| PCB 129_138_160_163 | 32 | 0.6790 | 0.1800 | 0.6205 | 1.1450 | 2.2800 | 15.47% | 100.00% |
| PCB 130             | 32 | 0.0224 | 0.0031 | 0.0181 | 0.0477 | 0.0806 | 0.53%  | 100.00% |
| PCB 131             | 32 | 0.0001 | 0.0000 | 0.0001 | 0.0003 | 0.0050 | 0.01%  | 9.38%   |
| PCB 132             | 32 | 0.0024 | 0.0003 | 0.0013 | 0.0045 | 0.0406 | 0.08%  | 100.00% |
| PCB 133             | 32 | 0.0145 | 0.0034 | 0.0109 | 0.0200 | 0.0500 | 0.29%  | 100.00% |
| PCB 134_143         | 32 | 0.0003 | 0.0000 | 0.0002 | 0.0008 | 0.0049 | 0.01%  | 75.00%  |
| PCB 135_151_154     | 32 | 0.0108 | 0.0011 | 0.0062 | 0.0176 | 0.0497 | 0.23%  | 100.00% |
| PCB 136             | 32 | 0.0007 | 0.0001 | 0.0004 | 0.0014 | 0.0075 | 0.02%  | 100.00% |
| PCB 137             | 32 | 0.0469 | 0.0132 | 0.0422 | 0.0710 | 0.1800 | 1.04%  | 100.00% |
| PCB 139_140         | 32 | 0.0026 | 0.0006 | 0.0017 | 0.0039 | 0.0119 | 0.05%  | 100.00% |
| PCB 141             | 32 | 0.0032 | 0.0000 | 0.0002 | 0.0054 | 0.0190 | 0.08%  | 68.75%  |
| PCB 142             | 32 | 0.0001 | 0.0000 | 0.0001 | 0.0002 | 0.0050 | 0.01%  | 0.00%   |
| PCB 144             | 32 | 0.0003 | 0.0000 | 0.0002 | 0.0007 | 0.0023 | 0.01%  | 96.88%  |
| PCB 145             | 32 | 0.0000 | 0.0000 | 0.0000 | 0.0000 | 0.0017 | 0.00%  | 9.38%   |
| PCB 146             | 32 | 0.0876 | 0.0202 | 0.0662 | 0.1580 | 0.3660 | 1.99%  | 100.00% |
| PCB 147_149         | 32 | 0.0066 | 0.0008 | 0.0039 | 0.0110 | 0.0542 | 0.18%  | 100.00% |
| PCB 148             | 32 | 0.0000 | 0.0000 | 0.0000 | 0.0001 | 0.0017 | 0.00%  | 65.63%  |
| PCB 150             | 32 | 0.0000 | 0.0000 | 0.0000 | 0.0000 | 0.0017 | 0.00%  | 12.50%  |
| PCB 152             | 32 | 0.0000 | 0.0000 | 0.0000 | 0.0000 | 0.0017 | 0.00%  | 18.75%  |
| PCB 153_168         | 32 | 0.8400 | 0.2370 | 0.6907 | 1.2475 | 2.4600 | 17.46% | 100.00% |
| PCB 155             | 32 | 0.0000 | 0.0000 | 0.0000 | 0.0000 | 0.0017 | 0.00%  | 59.38%  |
| PCB 156_157         | 32 | 0.1405 | 0.0373 | 0.1075 | 0.2133 | 0.5640 | 2.96%  | 100.00% |
| PCB 158             | 32 | 0.0153 | 0.0021 | 0.0081 | 0.0214 | 0.0782 | 0.29%  | 100.00% |
| PCB 159             | 32 | 0.0001 | 0.0000 | 0.0001 | 0.0003 | 0.0039 | 0.01%  | 34.38%  |
| PCB 161             | 32 | 0.0001 | 0.0000 | 0.0001 | 0.0002 | 0.0037 | 0.00%  | 0.00%   |
| PCB 162             | 32 | 0.0005 | 0.0000 | 0.0003 | 0.0008 | 0.0039 | 0.01%  | 84.38%  |
| PCB 164             | 32 | 0.0008 | 0.0000 | 0.0001 | 0.0016 | 0.0068 | 0.02%  | 50.00%  |
| PCB 165             | 32 | 0.0003 | 0.0001 | 0.0003 | 0.0004 | 0.0041 | 0.01%  | 87.50%  |
| PCB 167             | 32 | 0.0275 | 0.0072 | 0.0219 | 0.0422 | 0.0846 | 0.57%  | 100.00% |
| PCB 169             | 32 | 0.0009 | 0.0002 | 0.0007 | 0.0013 | 0.0045 | 0.02%  | 3.13%   |
| PCB 170             | 32 | 0.1630 | 0.0448 | 0.1195 | 0.2340 | 0.5350 | 3.25%  | 100.00% |
| PCB 171_173         | 32 | 0.0214 | 0.0061 | 0.0175 | 0.0316 | 0.0664 | 0.44%  | 100.00% |
| PCB 172             | 32 | 0.0229 | 0.0057 | 0.0157 | 0.0304 | 0.1030 | 0.45%  | 100.00% |
| PCB 174             | 32 | 0.0019 | 0.0002 | 0.0010 | 0.0032 | 0.0103 | 0.04%  | 100.00% |
| PCB 175             | 32 | 0.0024 | 0.0005 | 0.0017 | 0.0034 | 0.0091 | 0.05%  | 100.00% |
| PCB 176             | 32 | 0.0001 | 0.0000 | 0.0001 | 0.0002 | 0.0017 | 0.00%  | 87.50%  |
| PCB 177             | 32 | 0.0419 | 0.0060 | 0.0293 | 0.0559 | 0.1850 | 0.80%  | 100.00% |
| PCB 178             | 32 | 0.0341 | 0.0087 | 0.0241 | 0.0440 | 0.1280 | 0.68%  | 100.00% |
| PCB 179             | 32 | 0.0014 | 0.0002 | 0.0007 | 0.0020 | 0.0072 | 0.03%  | 100.00% |
| PCB 180_193         | 32 | 0.4310 | 0.1230 | 0.3455 | 0.5795 | 1.5200 | 8.94%  | 100.00% |



|             |    |        |        |        |        |        |       |         |
|-------------|----|--------|--------|--------|--------|--------|-------|---------|
| PCB 181     | 32 | 0.0008 | 0.0002 | 0.0005 | 0.0010 | 0.0023 | 0.02% | 96.88%  |
| PCB 182     | 32 | 0.0000 | 0.0000 | 0.0000 | 0.0000 | 0.0017 | 0.00% | 6.25%   |
| PCB 183_185 | 32 | 0.0683 | 0.0168 | 0.0460 | 0.0919 | 0.2010 | 1.30% | 100.00% |
| PCB 184     | 32 | 0.0000 | 0.0000 | 0.0000 | 0.0000 | 0.0017 | 0.00% | 34.38%  |
| PCB 186     | 32 | 0.0000 | 0.0000 | 0.0000 | 0.0000 | 0.0017 | 0.00% | 0.00%   |
| PCB 187     | 32 | 0.1505 | 0.0322 | 0.1085 | 0.1930 | 0.6230 | 3.14% | 100.00% |
| PCB 188     | 32 | 0.0000 | 0.0000 | 0.0000 | 0.0000 | 0.0017 | 0.00% | 43.75%  |
| PCB 189     | 32 | 0.0065 | 0.0016 | 0.0044 | 0.0082 | 0.0205 | 0.12% | 100.00% |
| PCB 190     | 32 | 0.0303 | 0.0081 | 0.0215 | 0.0387 | 0.0967 | 0.57% | 100.00% |
| PCB 191     | 32 | 0.0056 | 0.0016 | 0.0042 | 0.0074 | 0.0165 | 0.11% | 100.00% |
| PCB 192     | 32 | 0.0000 | 0.0000 | 0.0000 | 0.0000 | 0.0017 | 0.00% | 0.00%   |
| PCB 194     | 32 | 0.0605 | 0.0155 | 0.0381 | 0.0878 | 0.4400 | 1.45% | 100.00% |
| PCB 195     | 32 | 0.0148 | 0.0046 | 0.0112 | 0.0238 | 0.0650 | 0.34% | 100.00% |
| PCB 196     | 32 | 0.0255 | 0.0066 | 0.0176 | 0.0388 | 0.1920 | 0.62% | 100.00% |
| PCB 197_200 | 32 | 0.0007 | 0.0000 | 0.0005 | 0.0011 | 0.0028 | 0.02% | 93.75%  |
| PCB 198_199 | 32 | 0.0683 | 0.0176 | 0.0469 | 0.1070 | 0.9210 | 2.00% | 100.00% |
| PCB 201     | 32 | 0.0022 | 0.0005 | 0.0016 | 0.0036 | 0.0095 | 0.05% | 100.00% |
| PCB 202     | 32 | 0.0245 | 0.0060 | 0.0146 | 0.0343 | 0.2100 | 0.62% | 100.00% |
| PCB 203     | 32 | 0.0524 | 0.0139 | 0.0357 | 0.0841 | 0.6350 | 1.47% | 100.00% |
| PCB 204     | 32 | 0.0000 | 0.0000 | 0.0000 | 0.0000 | 0.0017 | 0.00% | 31.25%  |
| PCB 205     | 32 | 0.0017 | 0.0005 | 0.0011 | 0.0024 | 0.0077 | 0.04% | 96.88%  |
| PCB 206     | 32 | 0.0245 | 0.0061 | 0.0162 | 0.0384 | 0.4440 | 0.76% | 100.00% |
| PCB 207     | 32 | 0.0025 | 0.0006 | 0.0017 | 0.0038 | 0.0314 | 0.07% | 100.00% |
| PCB 208     | 32 | 0.0078 | 0.0020 | 0.0053 | 0.0146 | 0.1290 | 0.25% | 100.00% |
| PCB 209     | 32 | 0.0047 | 0.0011 | 0.0033 | 0.0070 | 0.0351 | 0.12% | 100.00% |

Appendix Table 4. Congener-specific PCB concentrations (ng/g lipid) in breast milk, New York State Angler Cohort Study, 1996-2002.

|              | n  | median | minimum | Percentile |        | maximum | relative weight |
|--------------|----|--------|---------|------------|--------|---------|-----------------|
|              |    |        |         | 25th       | 75th   |         |                 |
| PCB 1        | 27 | 0.0091 | 0.0038  | 0.0062     | 0.0136 | 0.1289  | 0.01%           |
| PCB 2        | 27 | 0.0017 | 0.0005  | 0.0012     | 0.0026 | 0.0697  | 0.00%           |
| PCB 3        | 27 | 0.0063 | 0.0018  | 0.0053     | 0.0095 | 0.1388  | 0.01%           |
| PCB 4        | 29 | 0.0152 | 0.0048  | 0.0100     | 0.0215 | 0.2250  | 0.01%           |
| PCB 5        | 29 | 0.0020 | 0.0007  | 0.0011     | 0.0038 | 0.0322  | 0.00%           |
| PCB 6        | 29 | 0.0089 | 0.0036  | 0.0054     | 0.0120 | 0.0704  | 0.01%           |
| PCB 7        | 29 | 0.0036 | 0.0009  | 0.0020     | 0.0088 | 0.0506  | 0.00%           |
| PCB 8        | 29 | 0.0341 | 0.0106  | 0.0205     | 0.0411 | 0.3072  | 0.03%           |
| PCB 9        | 29 | 0.0040 | 0.0017  | 0.0028     | 0.0057 | 0.0599  | 0.00%           |
| PCB 10       | 29 | 0.0017 | 0.0005  | 0.0010     | 0.0035 | 0.0307  | 0.00%           |
| PCB 11       | 29 | 0.0337 | 0.0125  | 0.0236     | 0.0487 | 0.8618  | 0.04%           |
| PCB 12_13    | 29 | 0.0030 | 0.0010  | 0.0020     | 0.0044 | 0.0599  | 0.00%           |
| PCB 14       | 29 | 0.0019 | 0.0004  | 0.0010     | 0.0039 | 0.0304  | 0.00%           |
| PCB 15       | 29 | 0.0120 | 0.0042  | 0.0084     | 0.0191 | 0.1362  | 0.01%           |
| PCB 16       | 29 | 0.0146 | 0.0047  | 0.0086     | 0.0187 | 0.1487  | 0.01%           |
| PCB 17       | 29 | 0.0148 | 0.0042  | 0.0088     | 0.0178 | 0.1355  | 0.01%           |
| PCB 18_30    | 29 | 0.0380 | 0.0124  | 0.0201     | 0.0449 | 0.2961  | 0.03%           |
| PCB 19       | 29 | 0.0038 | 0.0011  | 0.0024     | 0.0055 | 0.0568  | 0.00%           |
| PCB 20_28    | 29 | 2.9040 | 0.7105  | 2.0417     | 3.5880 | 9.9614  | 1.89%           |
| PCB 21_33    | 29 | 0.0473 | 0.0146  | 0.0348     | 0.0640 | 0.2684  | 0.04%           |
| PCB 22       | 29 | 0.0173 | 0.0076  | 0.0145     | 0.0307 | 0.1691  | 0.02%           |
| PCB 23       | 29 | 0.0004 | 0.0002  | 0.0003     | 0.0008 | 0.0072  | 0.00%           |
| PCB 24       | 29 | 0.0006 | 0.0002  | 0.0004     | 0.0008 | 0.0071  | 0.00%           |
| PCB 25       | 29 | 0.0031 | 0.0009  | 0.0018     | 0.0044 | 0.0294  | 0.00%           |
| PCB 26_29    | 29 | 0.0104 | 0.0048  | 0.0080     | 0.0157 | 0.1007  | 0.01%           |
| PCB 27       | 29 | 0.0024 | 0.0007  | 0.0012     | 0.0036 | 0.0278  | 0.00%           |
| PCB 31       | 29 | 0.0685 | 0.0342  | 0.0475     | 0.1076 | 0.4224  | 0.06%           |
| PCB 32       | 29 | 0.0097 | 0.0030  | 0.0057     | 0.0127 | 0.0993  | 0.01%           |
| PCB 34       | 29 | 0.0004 | 0.0002  | 0.0003     | 0.0008 | 0.0074  | 0.00%           |
| PCB 35       | 29 | 0.0006 | 0.0003  | 0.0004     | 0.0009 | 0.0312  | 0.00%           |
| PCB 36       | 29 | 0.0004 | 0.0002  | 0.0003     | 0.0008 | 0.0068  | 0.00%           |
| PCB 37       | 29 | 0.0099 | 0.0047  | 0.0066     | 0.0154 | 0.1046  | 0.01%           |
| PCB 38       | 29 | 0.0004 | 0.0002  | 0.0003     | 0.0008 | 0.0069  | 0.00%           |
| PCB 39       | 29 | 0.0004 | 0.0002  | 0.0003     | 0.0008 | 0.0070  | 0.00%           |
| PCB 40_41_71 | 29 | 0.0202 | 0.0058  | 0.0153     | 0.0401 | 0.1546  | 0.02%           |
| PCB 42       | 29 | 0.0127 | 0.0041  | 0.0100     | 0.0246 | 0.0796  | 0.01%           |
| PCB 43       | 29 | 0.0009 | 0.0003  | 0.0006     | 0.0015 | 0.0114  | 0.00%           |
| PCB 44_47_65 | 29 | 0.2674 | 0.0838  | 0.1818     | 0.5107 | 1.1969  | 0.21%           |
| PCB 45_51    | 29 | 0.0061 | 0.0017  | 0.0035     | 0.0073 | 0.0803  | 0.01%           |
| PCB 46       | 29 | 0.0018 | 0.0002  | 0.0007     | 0.0022 | 0.0291  | 0.00%           |
| PCB 48       | 29 | 0.0042 | 0.0014  | 0.0022     | 0.0069 | 0.0664  | 0.00%           |

|                          |    |         |        |        |         |         |       |
|--------------------------|----|---------|--------|--------|---------|---------|-------|
| PCB 49_69                | 29 | 0.0395  | 0.0200 | 0.0276 | 0.1258  | 0.2263  | 0.04% |
| PCB 50_53                | 29 | 0.0055  | 0.0014 | 0.0035 | 0.0102  | 0.0589  | 0.01% |
| PCB 52                   | 29 | 0.2054  | 0.0757 | 0.1417 | 0.6359  | 1.5136  | 0.26% |
| PCB 54                   | 29 | 0.0004  | 0.0001 | 0.0003 | 0.0008  | 0.0059  | 0.00% |
| PCB 55                   | 29 | 0.0026  | 0.0010 | 0.0017 | 0.0036  | 0.0191  | 0.00% |
| PCB 56                   | 29 | 0.0094  | 0.0020 | 0.0062 | 0.0195  | 0.0584  | 0.01% |
| PCB 57                   | 29 | 0.0025  | 0.0010 | 0.0017 | 0.0034  | 0.0187  | 0.00% |
| PCB 58                   | 29 | 0.0025  | 0.0010 | 0.0017 | 0.0033  | 0.0184  | 0.00% |
| PCB 59_62_75             | 29 | 0.0191  | 0.0005 | 0.0138 | 0.0331  | 0.0965  | 0.01% |
| PCB 60                   | 29 | 0.6499  | 0.1882 | 0.4637 | 0.9081  | 1.9730  | 0.42% |
| PCB 61_70_74_76          | 29 | 9.9010  | 3.0066 | 7.9167 | 11.2355 | 21.4806 | 6.26% |
| PCB 63                   | 29 | 0.0468  | 0.0101 | 0.0338 | 0.0787  | 0.1386  | 0.03% |
| PCB 64                   | 29 | 0.0389  | 0.0173 | 0.0289 | 0.1175  | 0.2129  | 0.04% |
| PCB 66                   | 29 | 1.7888  | 0.4783 | 1.2005 | 2.5527  | 5.3282  | 1.17% |
| PCB 67                   | 29 | 0.0023  | 0.0009 | 0.0016 | 0.0030  | 0.0164  | 0.00% |
| PCB 68                   | 29 | 0.0092  | 0.0046 | 0.0064 | 0.0107  | 0.0235  | 0.01% |
| PCB 72                   | 29 | 0.0023  | 0.0009 | 0.0017 | 0.0032  | 0.0187  | 0.00% |
| PCB 73                   | 29 | 0.0005  | 0.0001 | 0.0003 | 0.0008  | 0.0053  | 0.00% |
| PCB 77                   | 29 | 0.0047  | 0.0018 | 0.0035 | 0.0092  | 0.0519  | 0.00% |
| PCB 78                   | 29 | 0.0032  | 0.0011 | 0.0019 | 0.0080  | 0.0194  | 0.00% |
| PCB 79                   | 29 | 0.0025  | 0.0010 | 0.0015 | 0.0061  | 0.0170  | 0.00% |
| PCB 80                   | 29 | 0.0025  | 0.0010 | 0.0016 | 0.0034  | 0.0180  | 0.00% |
| PCB 81                   | 29 | 0.0099  | 0.0025 | 0.0050 | 0.0123  | 0.0311  | 0.01% |
| PCB 82                   | 29 | 0.0099  | 0.0027 | 0.0047 | 0.0207  | 0.1787  | 0.01% |
| PCB 83_99                | 29 | 8.6482  | 3.5263 | 7.8547 | 11.8317 | 25.9627 | 5.89% |
| PCB 84                   | 29 | 0.0220  | 0.0072 | 0.0153 | 0.0439  | 0.4572  | 0.04% |
| PCB 85_116_117           | 29 | 0.4233  | 0.0941 | 0.3457 | 0.7361  | 1.5741  | 0.36% |
| PCB 86_87_97_108_119_125 | 29 | 0.1147  | 0.0386 | 0.0731 | 0.2221  | 1.5407  | 0.14% |
| PCB 88_91                | 29 | 0.0120  | 0.0037 | 0.0072 | 0.0217  | 0.2234  | 0.02% |
| PCB 89                   | 29 | 0.0020  | 0.0003 | 0.0009 | 0.0027  | 0.0182  | 0.00% |
| PCB 90_101_113           | 29 | 0.4345  | 0.1099 | 0.3361 | 1.2209  | 3.2832  | 0.51% |
| PCB 92                   | 29 | 0.1838  | 0.0293 | 0.1179 | 0.5000  | 1.2030  | 0.18% |
| PCB 93_95_98_100_102     | 29 | 0.2627  | 0.0855 | 0.1785 | 0.5995  | 2.5052  | 0.32% |
| PCB 94                   | 29 | 0.0018  | 0.0003 | 0.0009 | 0.0026  | 0.0181  | 0.00% |
| PCB 96                   | 29 | 0.0006  | 0.0002 | 0.0003 | 0.0009  | 0.0056  | 0.00% |
| PCB 103                  | 29 | 0.0018  | 0.0002 | 0.0008 | 0.0025  | 0.0156  | 0.00% |
| PCB 104                  | 29 | 0.0004  | 0.0001 | 0.0003 | 0.0009  | 0.0095  | 0.00% |
| PCB 105                  | 29 | 2.9444  | 1.1053 | 2.1094 | 4.4194  | 8.3851  | 2.18% |
| PCB 106                  | 29 | 0.0097  | 0.0033 | 0.0064 | 0.0158  | 0.0427  | 0.01% |
| PCB 107_124              | 29 | 0.0127  | 0.0034 | 0.0077 | 0.0182  | 0.0514  | 0.01% |
| PCB 109                  | 29 | 0.2436  | 0.0532 | 0.1637 | 0.3807  | 0.9699  | 0.19% |
| PCB 110_115              | 29 | 0.4639  | 0.1243 | 0.2995 | 0.5989  | 3.8831  | 0.40% |
| PCB 111                  | 29 | 0.0109  | 0.0035 | 0.0093 | 0.0137  | 0.0310  | 0.01% |
| PCB 112                  | 29 | 0.0014  | 0.0002 | 0.0007 | 0.0019  | 0.0138  | 0.00% |
| PCB 114                  | 29 | 0.7470  | 0.4572 | 0.6513 | 1.1449  | 3.5031  | 0.62% |
| PCB 118                  | 29 | 11.6129 | 5.3618 | 9.1176 | 18.5442 | 35.8385 | 8.77% |

|                     |    |         |         |         |         |         |        |
|---------------------|----|---------|---------|---------|---------|---------|--------|
| PCB 120             | 29 | 0.0083  | 0.0025  | 0.0060  | 0.0099  | 0.0293  | 0.01%  |
| PCB 121             | 29 | 0.0040  | 0.0023  | 0.0036  | 0.0051  | 0.0131  | 0.00%  |
| PCB 122             | 29 | 0.0113  | 0.0035  | 0.0070  | 0.0182  | 0.0495  | 0.01%  |
| PCB 123             | 29 | 0.2042  | 0.1082  | 0.1639  | 0.3406  | 0.5946  | 0.16%  |
| PCB 126             | 29 | 0.0315  | 0.0108  | 0.0198  | 0.0384  | 0.0689  | 0.02%  |
| PCB 127             | 29 | 0.0198  | 0.0033  | 0.0082  | 0.0520  | 0.1224  | 0.02%  |
| PCB 128_166         | 29 | 0.4329  | 0.1553  | 0.3129  | 0.5569  | 1.2857  | 0.28%  |
| PCB 129_138_160_163 | 29 | 23.6534 | 11.8421 | 19.1369 | 29.2042 | 78.8820 | 15.69% |
| PCB 130             | 29 | 0.8062  | 0.2059  | 0.5495  | 0.9542  | 2.9441  | 0.54%  |
| PCB 131             | 29 | 0.0041  | 0.0013  | 0.0028  | 0.0062  | 0.0286  | 0.00%  |
| PCB 132             | 29 | 0.0788  | 0.0151  | 0.0396  | 0.1228  | 0.8476  | 0.08%  |
| PCB 133             | 29 | 0.4444  | 0.1991  | 0.3457  | 0.5481  | 1.3975  | 0.28%  |
| PCB 134_143         | 29 | 0.0090  | 0.0017  | 0.0046  | 0.0194  | 0.0916  | 0.01%  |
| PCB 135_151_154     | 29 | 0.3250  | 0.0697  | 0.1997  | 0.5406  | 1.0376  | 0.23%  |
| PCB 136             | 29 | 0.0188  | 0.0061  | 0.0145  | 0.0354  | 0.1570  | 0.02%  |
| PCB 137             | 29 | 1.5925  | 0.9144  | 1.2946  | 2.0346  | 5.9752  | 1.07%  |
| PCB 139_140         | 29 | 0.0839  | 0.0346  | 0.0649  | 0.1088  | 0.2484  | 0.06%  |
| PCB 141             | 29 | 0.0953  | 0.0016  | 0.0062  | 0.1650  | 0.4936  | 0.07%  |
| PCB 142             | 29 | 0.0040  | 0.0013  | 0.0028  | 0.0060  | 0.0288  | 0.00%  |
| PCB 144             | 29 | 0.0074  | 0.0016  | 0.0056  | 0.0194  | 0.0510  | 0.01%  |
| PCB 145             | 29 | 0.0004  | 0.0001  | 0.0003  | 0.0007  | 0.0056  | 0.00%  |
| PCB 146             | 29 | 3.2353  | 1.3289  | 2.2163  | 3.9599  | 10.2484 | 1.96%  |
| PCB 147_149         | 29 | 0.1816  | 0.0533  | 0.1517  | 0.3714  | 1.1315  | 0.18%  |
| PCB 148             | 29 | 0.0010  | 0.0002  | 0.0007  | 0.0016  | 0.0075  | 0.00%  |
| PCB 150             | 29 | 0.0005  | 0.0001  | 0.0003  | 0.0008  | 0.0054  | 0.00%  |
| PCB 152             | 29 | 0.0004  | 0.0001  | 0.0003  | 0.0006  | 0.0052  | 0.00%  |
| PCB 153_168         | 29 | 27.2587 | 14.6759 | 21.2500 | 35.0267 | 78.8820 | 17.46% |
| PCB 155             | 29 | 0.0006  | 0.0003  | 0.0004  | 0.0008  | 0.0092  | 0.00%  |
| PCB 156_157         | 29 | 4.4444  | 1.9954  | 3.2823  | 5.4455  | 17.8882 | 2.99%  |
| PCB 158             | 29 | 0.4733  | 0.1401  | 0.2899  | 0.6584  | 1.6326  | 0.30%  |
| PCB 159             | 29 | 0.0037  | 0.0013  | 0.0024  | 0.0068  | 0.0221  | 0.00%  |
| PCB 161             | 29 | 0.0028  | 0.0009  | 0.0020  | 0.0043  | 0.0203  | 0.00%  |
| PCB 162             | 29 | 0.0133  | 0.0013  | 0.0097  | 0.0251  | 0.0521  | 0.01%  |
| PCB 164             | 29 | 0.0221  | 0.0013  | 0.0030  | 0.0456  | 0.1688  | 0.02%  |
| PCB 165             | 29 | 0.0100  | 0.0034  | 0.0075  | 0.0123  | 0.0226  | 0.01%  |
| PCB 167             | 29 | 0.8456  | 0.4750  | 0.6640  | 1.0725  | 2.7640  | 0.58%  |
| PCB 169             | 29 | 0.0287  | 0.0127  | 0.0235  | 0.0339  | 0.0789  | 0.02%  |
| PCB 170             | 29 | 4.8387  | 2.3843  | 3.9121  | 5.9673  | 14.9068 | 3.24%  |
| PCB 171_173         | 29 | 0.7194  | 0.3912  | 0.5050  | 0.8575  | 2.0435  | 0.45%  |
| PCB 172             | 29 | 0.6950  | 0.3079  | 0.4871  | 0.8720  | 1.8696  | 0.45%  |
| PCB 174             | 29 | 0.0582  | 0.0074  | 0.0327  | 0.0952  | 0.2150  | 0.04%  |
| PCB 175             | 29 | 0.0721  | 0.0303  | 0.0636  | 0.1110  | 0.1752  | 0.05%  |
| PCB 176             | 29 | 0.0023  | 0.0001  | 0.0015  | 0.0040  | 0.0213  | 0.00%  |
| PCB 177             | 29 | 1.2201  | 0.3980  | 0.9677  | 1.6779  | 3.5714  | 0.80%  |
| PCB 178             | 29 | 1.0226  | 0.4421  | 0.8125  | 1.3660  | 2.5404  | 0.67%  |
| PCB 179             | 29 | 0.0437  | 0.0064  | 0.0275  | 0.0543  | 0.1501  | 0.03%  |

|             |    |         |        |         |         |         |       |
|-------------|----|---------|--------|---------|---------|---------|-------|
| PCB 180_193 | 29 | 13.6165 | 6.4352 | 10.1653 | 16.1438 | 32.4845 | 8.80% |
| PCB 181     | 29 | 0.0256  | 0.0092 | 0.0196  | 0.0308  | 0.0627  | 0.02% |
| PCB 182     | 29 | 0.0004  | 0.0001 | 0.0002  | 0.0008  | 0.0280  | 0.00% |
| PCB 183_185 | 29 | 2.0624  | 0.9040 | 1.6232  | 2.9019  | 5.1304  | 1.32% |
| PCB 184     | 29 | 0.0005  | 0.0000 | 0.0003  | 0.0009  | 0.0043  | 0.00% |
| PCB 186     | 29 | 0.0003  | 0.0001 | 0.0001  | 0.0006  | 0.0047  | 0.00% |
| PCB 187     | 29 | 4.4361  | 2.0481 | 3.2319  | 6.3636  | 12.9464 | 3.11% |
| PCB 188     | 29 | 0.0007  | 0.0001 | 0.0003  | 0.0009  | 0.0045  | 0.00% |
| PCB 189     | 29 | 0.1778  | 0.0880 | 0.1490  | 0.2464  | 0.5267  | 0.12% |
| PCB 190     | 29 | 0.9189  | 0.4977 | 0.7002  | 1.0963  | 2.3602  | 0.57% |
| PCB 191     | 29 | 0.1726  | 0.0930 | 0.1322  | 0.1915  | 0.4540  | 0.11% |
| PCB 192     | 29 | 0.0003  | 0.0001 | 0.0002  | 0.0007  | 0.0056  | 0.00% |
| PCB 194     | 29 | 1.7871  | 0.6597 | 1.4539  | 2.7599  | 13.0952 | 1.42% |
| PCB 195     | 29 | 0.4981  | 0.2259 | 0.3459  | 0.6797  | 1.7024  | 0.33% |
| PCB 196     | 29 | 0.7694  | 0.3372 | 0.5513  | 1.1452  | 5.7143  | 0.61% |
| PCB 197_200 | 29 | 0.0203  | 0.0001 | 0.0153  | 0.0329  | 0.0795  | 0.01% |
| PCB 198_199 | 29 | 1.9167  | 0.8218 | 1.4605  | 3.2620  | 27.4107 | 1.94% |
| PCB 201     | 29 | 0.0813  | 0.0231 | 0.0536  | 0.1099  | 0.2836  | 0.05% |
| PCB 202     | 29 | 0.7018  | 0.2500 | 0.5521  | 1.0561  | 6.2500  | 0.60% |
| PCB 203     | 29 | 1.6058  | 0.7361 | 1.2035  | 2.4706  | 18.8988 | 1.44% |
| PCB 204     | 29 | 0.0004  | 0.0000 | 0.0003  | 0.0008  | 0.0024  | 0.00% |
| PCB 205     | 29 | 0.0505  | 0.0248 | 0.0421  | 0.0628  | 0.1893  | 0.04% |
| PCB 206     | 29 | 0.7167  | 0.2894 | 0.5825  | 1.0415  | 13.2143 | 0.78% |
| PCB 207     | 29 | 0.0822  | 0.0267 | 0.0580  | 0.1273  | 0.9345  | 0.07% |
| PCB 208     | 29 | 0.2408  | 0.0750 | 0.1772  | 0.3877  | 3.8393  | 0.25% |
| PCB 209     | 29 | 0.1559  | 0.0562 | 0.1206  | 0.1894  | 0.5565  | 0.11% |

Appendix Table 5. Congener-specific PCB concentrations (ng/g serum) in child serum at 24 months of age, New York State Angler Cohort Study, 1996-2002.

|              | n  | median | Minimum | Percentile |        | maximum | relative weight | % above LOD |
|--------------|----|--------|---------|------------|--------|---------|-----------------|-------------|
|              |    |        |         | 25th       | 75th   |         |                 |             |
| PCB 1        | 17 | 0.0024 | 0.0009  | 0.0015     | 0.0033 | 0.0080  | 0.18%           | 100.00%     |
| PCB 2        | 17 | 0.0013 | 0.0005  | 0.0008     | 0.0017 | 0.0046  | 0.10%           | 88.24%      |
| PCB 3        | 17 | 0.0033 | 0.0010  | 0.0018     | 0.0042 | 0.0121  | 0.24%           | 100.00%     |
| PCB 4        | 17 | 0.0040 | 0.0019  | 0.0025     | 0.0060 | 0.0909  | 0.60%           | 70.59%      |
| PCB 5        | 17 | 0.0019 | 0.0006  | 0.0013     | 0.0030 | 0.0113  | 0.16%           | 5.88%       |
| PCB 6        | 17 | 0.0023 | 0.0005  | 0.0018     | 0.0029 | 0.0718  | 0.42%           | 47.06%      |
| PCB 7        | 17 | 0.0026 | 0.0010  | 0.0014     | 0.0041 | 0.0108  | 0.20%           | 52.94%      |
| PCB 8        | 17 | 0.0079 | 0.0031  | 0.0057     | 0.0098 | 0.5850  | 2.61%           | 100.00%     |
| PCB 9        | 17 | 0.0020 | 0.0005  | 0.0017     | 0.0028 | 0.0234  | 0.24%           | 35.29%      |
| PCB 10       | 17 | 0.0017 | 0.0005  | 0.0013     | 0.0027 | 0.0109  | 0.15%           | 0.00%       |
| PCB 11       | 17 | 0.0116 | 0.0043  | 0.0096     | 0.0212 | 0.0670  | 1.06%           | 100.00%     |
| PCB 12_13    | 17 | 0.0020 | 0.0006  | 0.0014     | 0.0030 | 0.0113  | 0.20%           | 23.53%      |
| PCB 14       | 17 | 0.0019 | 0.0005  | 0.0013     | 0.0027 | 0.0111  | 0.15%           | 0.00%       |
| PCB 15       | 17 | 0.0035 | 0.0013  | 0.0020     | 0.0048 | 0.1050  | 0.60%           | 64.71%      |
| PCB 16       | 17 | 0.0032 | 0.0013  | 0.0021     | 0.0040 | 0.2060  | 0.96%           | 100.00%     |
| PCB 17       | 17 | 0.0034 | 0.0013  | 0.0025     | 0.0046 | 0.1980  | 0.96%           | 100.00%     |
| PCB 18_30    | 17 | 0.0056 | 0.0030  | 0.0047     | 0.0100 | 0.4290  | 2.01%           | 100.00%     |
| PCB 19       | 17 | 0.0014 | 0.0006  | 0.0009     | 0.0017 | 0.0444  | 0.26%           | 94.12%      |
| PCB 20_28    | 17 | 0.0168 | 0.0072  | 0.0133     | 0.0263 | 0.4370  | 2.80%           | 100.00%     |
| PCB 21_33    | 17 | 0.0061 | 0.0024  | 0.0044     | 0.0090 | 0.3200  | 1.68%           | 100.00%     |
| PCB 22       | 17 | 0.0032 | 0.0012  | 0.0023     | 0.0058 | 0.2250  | 1.07%           | 100.00%     |
| PCB 23       | 17 | 0.0008 | 0.0002  | 0.0005     | 0.0009 | 0.0035  | 0.06%           | 52.94%      |
| PCB 24       | 17 | 0.0004 | 0.0001  | 0.0002     | 0.0007 | 0.0056  | 0.05%           | 17.65%      |
| PCB 25       | 17 | 0.0008 | 0.0002  | 0.0005     | 0.0011 | 0.0400  | 0.20%           | 82.35%      |
| PCB 26_29    | 17 | 0.0018 | 0.0008  | 0.0013     | 0.0028 | 0.1240  | 0.58%           | 100.00%     |
| PCB 27       | 17 | 0.0006 | 0.0001  | 0.0004     | 0.0010 | 0.0291  | 0.15%           | 94.12%      |
| PCB 31       | 17 | 0.0071 | 0.0036  | 0.0055     | 0.0137 | 0.5210  | 2.45%           | 100.00%     |
| PCB 32       | 17 | 0.0022 | 0.0011  | 0.0016     | 0.0027 | 0.1530  | 0.71%           | 100.00%     |
| PCB 34       | 17 | 0.0007 | 0.0001  | 0.0005     | 0.0009 | 0.0045  | 0.07%           | 47.06%      |
| PCB 35       | 17 | 0.0009 | 0.0002  | 0.0005     | 0.0012 | 0.0046  | 0.08%           | 52.94%      |
| PCB 36       | 17 | 0.0004 | 0.0001  | 0.0003     | 0.0008 | 0.0012  | 0.03%           | 11.76%      |
| PCB 37       | 17 | 0.0022 | 0.0010  | 0.0014     | 0.0037 | 0.0399  | 0.35%           | 100.00%     |
| PCB 38       | 17 | 0.0004 | 0.0001  | 0.0003     | 0.0008 | 0.0013  | 0.03%           | 11.76%      |
| PCB 39       | 17 | 0.0004 | 0.0001  | 0.0003     | 0.0007 | 0.0012  | 0.03%           | 0.00%       |
| PCB 40_41_71 | 17 | 0.0037 | 0.0013  | 0.0026     | 0.0053 | 0.0653  | 0.56%           | 100.00%     |
| PCB 42       | 17 | 0.0016 | 0.0006  | 0.0012     | 0.0025 | 0.0273  | 0.23%           | 100.00%     |
| PCB 43       | 17 | 0.0004 | 0.0001  | 0.0003     | 0.0006 | 0.0046  | 0.04%           | 47.06%      |
| PCB 44_47_65 | 17 | 0.0094 | 0.0034  | 0.0069     | 0.0135 | 0.1000  | 1.01%           | 100.00%     |
| PCB 45_51    | 17 | 0.0023 | 0.0005  | 0.0015     | 0.0030 | 0.0325  | 0.29%           | 100.00%     |
| PCB 46       | 17 | 0.0006 | 0.0001  | 0.0005     | 0.0010 | 0.0122  | 0.09%           | 70.59%      |
| PCB 48       | 17 | 0.0014 | 0.0005  | 0.0010     | 0.0021 | 0.0291  | 0.20%           | 94.12%      |
| PCB 49_69    | 17 | 0.0042 | 0.0015  | 0.0029     | 0.0061 | 0.0606  | 0.51%           | 100.00%     |

|                          |    |        |        |        |        |        |       |         |
|--------------------------|----|--------|--------|--------|--------|--------|-------|---------|
| PCB 50_53                | 17 | 0.0015 | 0.0005 | 0.0010 | 0.0019 | 0.0237 | 0.19% | 100.00% |
| PCB 52                   | 17 | 0.0107 | 0.0044 | 0.0077 | 0.0142 | 0.1130 | 1.13% | 100.00% |
| PCB 54                   | 17 | 0.0004 | 0.0001 | 0.0002 | 0.0007 | 0.0027 | 0.04% | 82.35%  |
| PCB 55                   | 17 | 0.0008 | 0.0002 | 0.0005 | 0.0010 | 0.0019 | 0.05% | 5.88%   |
| PCB 56                   | 17 | 0.0026 | 0.0007 | 0.0015 | 0.0037 | 0.0201 | 0.28% | 100.00% |
| PCB 57                   | 17 | 0.0008 | 0.0002 | 0.0005 | 0.0010 | 0.0028 | 0.06% | 5.88%   |
| PCB 58                   | 17 | 0.0009 | 0.0002 | 0.0005 | 0.0010 | 0.0016 | 0.05% | 0.00%   |
| PCB 59_62_75             | 17 | 0.0008 | 0.0000 | 0.0006 | 0.0010 | 0.0108 | 0.09% | 88.24%  |
| PCB 60                   | 17 | 0.0037 | 0.0011 | 0.0019 | 0.0057 | 0.0146 | 0.30% | 100.00% |
| PCB 61_70_74_76          | 17 | 0.0434 | 0.0111 | 0.0223 | 0.0816 | 0.1800 | 3.88% | 100.00% |
| PCB 63                   | 17 | 0.0008 | 0.0003 | 0.0006 | 0.0011 | 0.0022 | 0.06% | 23.53%  |
| PCB 64                   | 17 | 0.0024 | 0.0009 | 0.0017 | 0.0039 | 0.0385 | 0.34% | 100.00% |
| PCB 66                   | 17 | 0.0113 | 0.0044 | 0.0069 | 0.0149 | 0.0497 | 0.93% | 100.00% |
| PCB 67                   | 17 | 0.0008 | 0.0002 | 0.0004 | 0.0009 | 0.0024 | 0.05% | 11.76%  |
| PCB 68                   | 17 | 0.0008 | 0.0002 | 0.0005 | 0.0010 | 0.0014 | 0.05% | 17.65%  |
| PCB 72                   | 17 | 0.0114 | 0.0004 | 0.0066 | 0.0255 | 0.0553 | 1.05% | 94.12%  |
| PCB 73                   | 17 | 0.0003 | 0.0000 | 0.0002 | 0.0004 | 0.0010 | 0.02% | 29.41%  |
| PCB 77                   | 17 | 0.0012 | 0.0005 | 0.0008 | 0.0019 | 0.0093 | 0.11% | 82.35%  |
| PCB 78                   | 17 | 0.0008 | 0.0002 | 0.0005 | 0.0011 | 0.0017 | 0.05% | 0.00%   |
| PCB 79                   | 17 | 0.0008 | 0.0002 | 0.0004 | 0.0009 | 0.0014 | 0.04% | 0.00%   |
| PCB 80                   | 17 | 0.0007 | 0.0002 | 0.0004 | 0.0009 | 0.0015 | 0.05% | 0.00%   |
| PCB 81                   | 17 | 0.0009 | 0.0002 | 0.0006 | 0.0011 | 0.0036 | 0.06% | 47.06%  |
| PCB 82                   | 17 | 0.0018 | 0.0005 | 0.0011 | 0.0024 | 0.0065 | 0.14% | 11.76%  |
| PCB 83_99                | 17 | 0.0251 | 0.0072 | 0.0174 | 0.0522 | 0.2430 | 3.06% | 100.00% |
| PCB 84                   | 17 | 0.0021 | 0.0007 | 0.0014 | 0.0033 | 0.0137 | 0.21% | 82.35%  |
| PCB 85_116_117           | 17 | 0.0040 | 0.0007 | 0.0022 | 0.0046 | 0.0132 | 0.25% | 70.59%  |
| PCB 86_87_97_108_119_125 | 17 | 0.0071 | 0.0028 | 0.0035 | 0.0127 | 0.0357 | 0.59% | 100.00% |
| PCB 88_91                | 17 | 0.0018 | 0.0006 | 0.0010 | 0.0036 | 0.0100 | 0.17% | 35.29%  |
| PCB 89                   | 17 | 0.0016 | 0.0005 | 0.0009 | 0.0022 | 0.0057 | 0.12% | 0.00%   |
| PCB 90_101_113           | 17 | 0.0114 | 0.0049 | 0.0085 | 0.0144 | 0.1070 | 1.14% | 100.00% |
| PCB 92                   | 17 | 0.0024 | 0.0009 | 0.0016 | 0.0036 | 0.0150 | 0.22% | 70.59%  |
| PCB 93_95_98_100_102     | 17 | 0.0125 | 0.0050 | 0.0071 | 0.0309 | 0.0950 | 1.55% | 100.00% |
| PCB 94                   | 17 | 0.0015 | 0.0005 | 0.0009 | 0.0021 | 0.0056 | 0.12% | 0.00%   |
| PCB 96                   | 17 | 0.0005 | 0.0002 | 0.0004 | 0.0009 | 0.0019 | 0.04% | 5.88%   |
| PCB 103                  | 17 | 0.0244 | 0.0038 | 0.0131 | 0.0406 | 0.1180 | 1.97% | 94.12%  |
| PCB 104                  | 17 | 0.0006 | 0.0002 | 0.0005 | 0.0012 | 0.0029 | 0.06% | 35.29%  |
| PCB 105                  | 17 | 0.0099 | 0.0035 | 0.0053 | 0.0228 | 0.0391 | 0.94% | 100.00% |
| PCB 106                  | 17 | 0.0020 | 0.0005 | 0.0007 | 0.0026 | 0.0056 | 0.13% | 0.00%   |
| PCB 107_124              | 17 | 0.0021 | 0.0005 | 0.0008 | 0.0027 | 0.0074 | 0.14% | 0.00%   |
| PCB 109                  | 17 | 0.0024 | 0.0005 | 0.0019 | 0.0030 | 0.0058 | 0.16% | 35.29%  |
| PCB 110_115              | 17 | 0.0099 | 0.0037 | 0.0074 | 0.0179 | 0.0676 | 0.94% | 100.00% |
| PCB 111                  | 17 | 0.0012 | 0.0003 | 0.0006 | 0.0016 | 0.0044 | 0.09% | 0.00%   |
| PCB 112                  | 17 | 0.0012 | 0.0003 | 0.0007 | 0.0016 | 0.0042 | 0.09% | 0.00%   |
| PCB 114                  | 17 | 0.0038 | 0.0009 | 0.0024 | 0.0059 | 0.0162 | 0.32% | 76.47%  |
| PCB 118                  | 17 | 0.0390 | 0.0128 | 0.0184 | 0.1010 | 0.1700 | 4.05% | 100.00% |
| PCB 120                  | 17 | 0.0012 | 0.0003 | 0.0006 | 0.0016 | 0.0044 | 0.09% | 0.00%   |

|                     |    |        |        |        |        |        |       |         |
|---------------------|----|--------|--------|--------|--------|--------|-------|---------|
| PCB 121             | 17 | 0.0011 | 0.0003 | 0.0007 | 0.0015 | 0.0042 | 0.09% | 0.00%   |
| PCB 122             | 17 | 0.0023 | 0.0005 | 0.0008 | 0.0029 | 0.0065 | 0.14% | 0.00%   |
| PCB 123             | 17 | 0.0022 | 0.0005 | 0.0020 | 0.0039 | 0.0060 | 0.18% | 35.29%  |
| PCB 126             | 17 | 0.0024 | 0.0005 | 0.0010 | 0.0028 | 0.0064 | 0.15% | 17.65%  |
| PCB 127             | 17 | 0.0023 | 0.0005 | 0.0008 | 0.0028 | 0.0057 | 0.14% | 5.88%   |
| PCB 128_166         | 17 | 0.0022 | 0.0009 | 0.0014 | 0.0033 | 0.0149 | 0.20% | 94.12%  |
| PCB 129_138_160_163 | 17 | 0.0642 | 0.0226 | 0.0419 | 0.1700 | 0.5570 | 9.07% | 100.00% |
| PCB 130             | 17 | 0.0026 | 0.0008 | 0.0012 | 0.0051 | 0.0182 | 0.28% | 88.24%  |
| PCB 131             | 17 | 0.0008 | 0.0001 | 0.0003 | 0.0016 | 0.0072 | 0.08% | 17.65%  |
| PCB 132             | 17 | 0.0038 | 0.0014 | 0.0022 | 0.0043 | 0.0669 | 0.43% | 88.24%  |
| PCB 133             | 17 | 0.0015 | 0.0001 | 0.0007 | 0.0023 | 0.0118 | 0.16% | 35.29%  |
| PCB 134_143         | 17 | 0.0015 | 0.0004 | 0.0008 | 0.0021 | 0.0106 | 0.12% | 47.06%  |
| PCB 135_151_154     | 17 | 0.0080 | 0.0033 | 0.0054 | 0.0100 | 0.1310 | 0.94% | 100.00% |
| PCB 136             | 17 | 0.0023 | 0.0008 | 0.0011 | 0.0032 | 0.0570 | 0.36% | 94.12%  |
| PCB 137             | 17 | 0.0040 | 0.0014 | 0.0022 | 0.0083 | 0.0368 | 0.51% | 94.12%  |
| PCB 139_140         | 17 | 0.0009 | 0.0002 | 0.0006 | 0.0014 | 0.0065 | 0.08% | 35.29%  |
| PCB 141             | 17 | 0.0025 | 0.0010 | 0.0017 | 0.0030 | 0.0659 | 0.37% | 82.35%  |
| PCB 142             | 17 | 0.0008 | 0.0001 | 0.0004 | 0.0016 | 0.0074 | 0.08% | 5.88%   |
| PCB 144             | 17 | 0.0009 | 0.0001 | 0.0006 | 0.0015 | 0.0191 | 0.12% | 47.06%  |
| PCB 145             | 17 | 0.0004 | 0.0000 | 0.0001 | 0.0010 | 0.0036 | 0.04% | 11.76%  |
| PCB 146             | 17 | 0.0076 | 0.0015 | 0.0038 | 0.0176 | 0.0790 | 1.10% | 94.12%  |
| PCB 147_149         | 17 | 0.0118 | 0.0044 | 0.0066 | 0.0144 | 0.2640 | 1.59% | 100.00% |
| PCB 148             | 17 | 0.0005 | 0.0001 | 0.0002 | 0.0013 | 0.0046 | 0.06% | 11.76%  |
| PCB 150             | 17 | 0.0004 | 0.0000 | 0.0001 | 0.0009 | 0.0034 | 0.04% | 11.76%  |
| PCB 152             | 17 | 0.0004 | 0.0001 | 0.0001 | 0.0009 | 0.0033 | 0.04% | 11.76%  |
| PCB 153_168         | 17 | 0.0712 | 0.0232 | 0.0326 | 0.1570 | 0.8040 | 9.91% | 100.00% |
| PCB 155             | 17 | 0.0004 | 0.0000 | 0.0002 | 0.0008 | 0.0033 | 0.04% | 47.06%  |
| PCB 156_157         | 17 | 0.0118 | 0.0028 | 0.0046 | 0.0273 | 0.1230 | 1.52% | 100.00% |
| PCB 158             | 17 | 0.0029 | 0.0013 | 0.0018 | 0.0040 | 0.0218 | 0.26% | 94.12%  |
| PCB 159             | 17 | 0.0005 | 0.0001 | 0.0003 | 0.0012 | 0.0052 | 0.06% | 23.53%  |
| PCB 161             | 17 | 0.0005 | 0.0001 | 0.0002 | 0.0011 | 0.0052 | 0.06% | 5.88%   |
| PCB 162             | 17 | 0.0006 | 0.0001 | 0.0003 | 0.0012 | 0.0053 | 0.06% | 17.65%  |
| PCB 164             | 17 | 0.0009 | 0.0001 | 0.0003 | 0.0012 | 0.0159 | 0.11% | 29.41%  |
| PCB 165             | 17 | 0.0006 | 0.0001 | 0.0003 | 0.0013 | 0.0057 | 0.06% | 11.76%  |
| PCB 167             | 17 | 0.0042 | 0.0001 | 0.0020 | 0.0103 | 0.0231 | 0.41% | 94.12%  |
| PCB 169             | 17 | 0.0006 | 0.0003 | 0.0004 | 0.0014 | 0.0053 | 0.07% | 0.00%   |
| PCB 170             | 17 | 0.0136 | 0.0044 | 0.0075 | 0.0329 | 0.1790 | 2.08% | 100.00% |
| PCB 171_173         | 17 | 0.0020 | 0.0005 | 0.0012 | 0.0052 | 0.0361 | 0.36% | 100.00% |
| PCB 172             | 17 | 0.0017 | 0.0001 | 0.0007 | 0.0058 | 0.0272 | 0.30% | 88.24%  |
| PCB 174             | 17 | 0.0021 | 0.0010 | 0.0019 | 0.0034 | 0.1060 | 0.53% | 100.00% |
| PCB 175             | 17 | 0.0005 | 0.0001 | 0.0003 | 0.0011 | 0.0054 | 0.06% | 47.06%  |
| PCB 176             | 17 | 0.0005 | 0.0001 | 0.0003 | 0.0008 | 0.0148 | 0.09% | 76.47%  |
| PCB 177             | 17 | 0.0035 | 0.0015 | 0.0022 | 0.0092 | 0.0613 | 0.61% | 100.00% |
| PCB 178             | 17 | 0.0032 | 0.0006 | 0.0013 | 0.0089 | 0.0376 | 0.48% | 100.00% |
| PCB 179             | 17 | 0.0018 | 0.0008 | 0.0011 | 0.0024 | 0.0656 | 0.34% | 100.00% |
| PCB 180_193         | 17 | 0.0348 | 0.0114 | 0.0137 | 0.1050 | 0.5090 | 5.88% | 100.00% |



|             |    |        |        |        |        |        |       |         |
|-------------|----|--------|--------|--------|--------|--------|-------|---------|
| PCB 181     | 17 | 0.0004 | 0.0001 | 0.0002 | 0.0006 | 0.0025 | 0.03% | 23.53%  |
| PCB 182     | 17 | 0.0004 | 0.0001 | 0.0002 | 0.0006 | 0.0025 | 0.04% | 41.18%  |
| PCB 183_185 | 17 | 0.0077 | 0.0026 | 0.0046 | 0.0313 | 0.0796 | 1.26% | 100.00% |
| PCB 184     | 17 | 0.0002 | 0.0000 | 0.0001 | 0.0004 | 0.0018 | 0.02% | 11.76%  |
| PCB 186     | 17 | 0.0002 | 0.0000 | 0.0001 | 0.0005 | 0.0019 | 0.03% | 5.88%   |
| PCB 187     | 17 | 0.0120 | 0.0049 | 0.0057 | 0.0429 | 0.1470 | 2.23% | 100.00% |
| PCB 188     | 17 | 0.0002 | 0.0000 | 0.0001 | 0.0005 | 0.0021 | 0.03% | 52.94%  |
| PCB 189     | 17 | 0.0009 | 0.0001 | 0.0006 | 0.0021 | 0.0095 | 0.11% | 100.00% |
| PCB 190     | 17 | 0.0023 | 0.0003 | 0.0013 | 0.0067 | 0.0261 | 0.37% | 100.00% |
| PCB 191     | 17 | 0.0007 | 0.0001 | 0.0004 | 0.0022 | 0.0073 | 0.10% | 64.71%  |
| PCB 192     | 17 | 0.0003 | 0.0000 | 0.0001 | 0.0005 | 0.0022 | 0.03% | 0.00%   |
| PCB 194     | 17 | 0.0048 | 0.0014 | 0.0027 | 0.0135 | 0.0756 | 1.13% | 100.00% |
| PCB 195     | 17 | 0.0012 | 0.0005 | 0.0006 | 0.0040 | 0.0225 | 0.26% | 100.00% |
| PCB 196     | 17 | 0.0023 | 0.0008 | 0.0014 | 0.0072 | 0.0300 | 0.49% | 100.00% |
| PCB 197_200 | 17 | 0.0003 | 0.0001 | 0.0002 | 0.0005 | 0.0095 | 0.06% | 88.24%  |
| PCB 198_199 | 17 | 0.0062 | 0.0013 | 0.0028 | 0.0147 | 0.1510 | 1.56% | 100.00% |
| PCB 201     | 17 | 0.0004 | 0.0001 | 0.0002 | 0.0013 | 0.0054 | 0.06% | 88.24%  |
| PCB 202     | 17 | 0.0024 | 0.0002 | 0.0010 | 0.0048 | 0.0345 | 0.46% | 88.24%  |
| PCB 203     | 17 | 0.0046 | 0.0004 | 0.0020 | 0.0086 | 0.0890 | 0.94% | 94.12%  |
| PCB 204     | 17 | 0.0001 | 0.0000 | 0.0001 | 0.0003 | 0.0007 | 0.01% | 29.41%  |
| PCB 205     | 17 | 0.0006 | 0.0002 | 0.0003 | 0.0012 | 0.0035 | 0.06% | 100.00% |
| PCB 206     | 17 | 0.0046 | 0.0014 | 0.0022 | 0.0057 | 0.0768 | 0.66% | 82.35%  |
| PCB 207     | 17 | 0.0014 | 0.0004 | 0.0010 | 0.0024 | 0.0061 | 0.11% | 17.65%  |
| PCB 208     | 17 | 0.0020 | 0.0009 | 0.0015 | 0.0031 | 0.0203 | 0.24% | 70.59%  |
| PCB 209     | 17 | 0.0033 | 0.0010 | 0.0022 | 0.0043 | 0.0067 | 0.20% | 100.00% |

Appendix Table 6. Congener-specific PCB concentrations (ng/g lipid) in child serum at 24 months of age, New York State Angler Cohort Study, 1996-2002.

|              | n  | median | minimum | Percentile |        | maximum  | relative weight |
|--------------|----|--------|---------|------------|--------|----------|-----------------|
|              |    |        |         | 25th       | 75th   |          |                 |
| PCB 1        | 16 | 0.4426 | 0.1718  | 0.2806     | 0.5578 | 1.5170   | 0.20%           |
| PCB 2        | 16 | 0.2352 | 0.1090  | 0.1468     | 0.3000 | 0.5736   | 0.10%           |
| PCB 3        | 16 | 0.5825 | 0.1983  | 0.3256     | 0.7002 | 1.4453   | 0.24%           |
| PCB 4        | 16 | 0.6987 | 0.2958  | 0.4440     | 1.0294 | 17.1509  | 0.69%           |
| PCB 5        | 16 | 0.3119 | 0.1029  | 0.2628     | 0.5525 | 0.6921   | 0.15%           |
| PCB 6        | 16 | 0.4251 | 0.1080  | 0.2662     | 0.5487 | 13.5472  | 0.48%           |
| PCB 7        | 16 | 0.4262 | 0.1465  | 0.2694     | 0.5992 | 1.4849   | 0.20%           |
| PCB 8        | 16 | 1.3379 | 0.6282  | 0.9902     | 1.7582 | 110.3774 | 3.24%           |
| PCB 9        | 16 | 0.3783 | 0.1069  | 0.2646     | 0.5339 | 4.4151   | 0.25%           |
| PCB 10       | 16 | 0.2696 | 0.0984  | 0.2420     | 0.4408 | 0.6698   | 0.13%           |
| PCB 11       | 16 | 2.1574 | 0.9021  | 1.5024     | 2.9664 | 6.4151   | 1.02%           |
| PCB 12_13    | 16 | 0.3878 | 0.1090  | 0.2706     | 0.5497 | 2.1321   | 0.20%           |
| PCB 14       | 16 | 0.2732 | 0.1069  | 0.2580     | 0.4634 | 0.6810   | 0.14%           |
| PCB 15       | 16 | 0.6452 | 0.1958  | 0.3846     | 0.7300 | 19.8113  | 0.71%           |
| PCB 16       | 16 | 0.4957 | 0.2729  | 0.3636     | 0.7514 | 38.8679  | 1.17%           |
| PCB 17       | 16 | 0.5764 | 0.2771  | 0.3778     | 0.8610 | 37.3585  | 1.16%           |
| PCB 18_30    | 16 | 1.0578 | 0.6292  | 0.7442     | 1.8110 | 80.9434  | 2.46%           |
| PCB 19       | 16 | 0.2147 | 0.0815  | 0.1821     | 0.2992 | 8.3774   | 0.30%           |
| PCB 20_28    | 16 | 2.9323 | 1.3055  | 2.3313     | 4.3449 | 82.4528  | 3.27%           |
| PCB 21_33    | 16 | 1.1550 | 0.4959  | 0.7202     | 1.5407 | 60.3774  | 2.00%           |
| PCB 22       | 16 | 0.5802 | 0.2367  | 0.3646     | 0.8435 | 42.4528  | 1.29%           |
| PCB 23       | 16 | 0.1276 | 0.0346  | 0.0973     | 0.1652 | 0.4531   | 0.06%           |
| PCB 24       | 16 | 0.0529 | 0.0133  | 0.0403     | 0.1231 | 1.0604   | 0.05%           |
| PCB 25       | 16 | 0.1361 | 0.0333  | 0.0800     | 0.1826 | 7.5472   | 0.24%           |
| PCB 26_29    | 16 | 0.3110 | 0.1638  | 0.2133     | 0.4821 | 23.3962  | 0.71%           |
| PCB 27       | 16 | 0.0983 | 0.0227  | 0.0639     | 0.1847 | 5.4906   | 0.18%           |
| PCB 31       | 16 | 1.3896 | 0.7408  | 0.9079     | 2.0194 | 98.3019  | 2.98%           |
| PCB 32       | 16 | 0.3701 | 0.2225  | 0.2513     | 0.5303 | 28.8679  | 0.87%           |
| PCB 34       | 16 | 0.1249 | 0.0235  | 0.0804     | 0.1581 | 0.5660   | 0.06%           |
| PCB 35       | 16 | 0.1640 | 0.0362  | 0.0776     | 0.2143 | 0.7396   | 0.07%           |
| PCB 36       | 16 | 0.0630 | 0.0229  | 0.0450     | 0.1521 | 0.2042   | 0.04%           |
| PCB 37       | 16 | 0.4163 | 0.1961  | 0.2855     | 0.5058 | 7.5283   | 0.35%           |
| PCB 38       | 16 | 0.0626 | 0.0220  | 0.0444     | 0.1528 | 0.2240   | 0.04%           |
| PCB 39       | 16 | 0.0616 | 0.0222  | 0.0414     | 0.1469 | 0.2142   | 0.04%           |
| PCB 40_41_71 | 16 | 0.6331 | 0.2612  | 0.4920     | 0.8514 | 12.3208  | 0.58%           |
| PCB 42       | 16 | 0.2718 | 0.1190  | 0.2108     | 0.3913 | 5.1509   | 0.24%           |
| PCB 43       | 16 | 0.0677 | 0.0143  | 0.0491     | 0.0989 | 0.8736   | 0.05%           |
| PCB 44_47_65 | 16 | 1.7986 | 0.6939  | 1.0571     | 2.1935 | 18.8679  | 1.07%           |
| PCB 45_51    | 16 | 0.3803 | 0.1090  | 0.2703     | 0.5561 | 6.1321   | 0.32%           |
| PCB 46       | 16 | 0.1061 | 0.0126  | 0.0801     | 0.1464 | 2.3019   | 0.10%           |
| PCB 48       | 16 | 0.2356 | 0.1111  | 0.1601     | 0.3443 | 5.4906   | 0.23%           |
| PCB 49_69    | 16 | 0.7173 | 0.3000  | 0.4891     | 0.8926 | 11.4340  | 0.55%           |

|                          |    |        |        |        |         |         |       |
|--------------------------|----|--------|--------|--------|---------|---------|-------|
| PCB 50_53                | 16 | 0.2326 | 0.0939 | 0.1728 | 0.3308  | 4.4717  | 0.21% |
| PCB 52                   | 16 | 1.9368 | 0.9082 | 1.3385 | 2.6654  | 21.3208 | 1.23% |
| PCB 54                   | 16 | 0.0689 | 0.0138 | 0.0455 | 0.1047  | 0.2735  | 0.04% |
| PCB 55                   | 16 | 0.1343 | 0.0465 | 0.0874 | 0.2077  | 0.3604  | 0.06% |
| PCB 56                   | 16 | 0.4647 | 0.1492 | 0.2649 | 0.5582  | 3.7170  | 0.26% |
| PCB 57                   | 16 | 0.1342 | 0.0463 | 0.0872 | 0.2087  | 0.5264  | 0.06% |
| PCB 58                   | 16 | 0.1416 | 0.0458 | 0.0865 | 0.2040  | 0.2509  | 0.06% |
| PCB 59_62_75             | 16 | 0.1333 | 0.0083 | 0.0979 | 0.1711  | 2.0377  | 0.10% |
| PCB 60                   | 16 | 0.6059 | 0.2182 | 0.3497 | 0.9760  | 2.2075  | 0.31% |
| PCB 61_70_74_76          | 16 | 7.4401 | 2.3125 | 3.7620 | 13.9549 | 23.0189 | 3.96% |
| PCB 63                   | 16 | 0.1519 | 0.0550 | 0.0859 | 0.1986  | 0.4189  | 0.06% |
| PCB 64                   | 16 | 0.3921 | 0.1912 | 0.3047 | 0.6297  | 7.2642  | 0.35% |
| PCB 66                   | 16 | 1.7249 | 0.8382 | 1.2230 | 2.7311  | 7.8302  | 0.93% |
| PCB 67                   | 16 | 0.1360 | 0.0410 | 0.0774 | 0.2022  | 0.4604  | 0.06% |
| PCB 68                   | 16 | 0.1243 | 0.0433 | 0.0871 | 0.2063  | 0.2244  | 0.05% |
| PCB 72                   | 16 | 2.0573 | 0.0599 | 1.2463 | 4.3550  | 8.3788  | 1.14% |
| PCB 73                   | 16 | 0.0446 | 0.0040 | 0.0256 | 0.0637  | 0.1111  | 0.02% |
| PCB 77                   | 16 | 0.2154 | 0.0668 | 0.1552 | 0.2906  | 0.5061  | 0.10% |
| PCB 78                   | 16 | 0.1449 | 0.0456 | 0.0898 | 0.2129  | 0.2606  | 0.06% |
| PCB 79                   | 16 | 0.1261 | 0.0373 | 0.0717 | 0.1781  | 0.2302  | 0.05% |
| PCB 80                   | 16 | 0.1274 | 0.0417 | 0.0801 | 0.1868  | 0.2258  | 0.05% |
| PCB 81                   | 16 | 0.1552 | 0.0477 | 0.1082 | 0.2028  | 0.3184  | 0.06% |
| PCB 82                   | 16 | 0.2883 | 0.1022 | 0.1659 | 0.4208  | 0.9833  | 0.14% |
| PCB 83_99                | 16 | 4.6288 | 1.5083 | 3.3936 | 10.1647 | 41.8966 | 3.33% |
| PCB 84                   | 16 | 0.3570 | 0.1427 | 0.2343 | 0.6394  | 1.6321  | 0.21% |
| PCB 85_116_117           | 16 | 0.6153 | 0.1304 | 0.4123 | 0.7551  | 1.0690  | 0.24% |
| PCB 86_87_97_108_119_125 | 16 | 1.0738 | 0.4897 | 0.7057 | 1.7285  | 3.7551  | 0.57% |
| PCB 88_91                | 16 | 0.3241 | 0.1151 | 0.1592 | 0.5147  | 1.5136  | 0.18% |
| PCB 89                   | 16 | 0.2588 | 0.0955 | 0.1555 | 0.3752  | 0.8682  | 0.13% |
| PCB 90_101_113           | 16 | 1.9067 | 1.0187 | 1.3546 | 2.5543  | 6.3585  | 0.94% |
| PCB 92                   | 16 | 0.3916 | 0.1891 | 0.3304 | 0.5960  | 1.3449  | 0.20% |
| PCB 93_95_98_100_102     | 16 | 2.3089 | 1.0354 | 1.3243 | 4.6927  | 12.3396 | 1.49% |
| PCB 94                   | 16 | 0.2515 | 0.0953 | 0.1569 | 0.3657  | 0.8673  | 0.13% |
| PCB 96                   | 16 | 0.0807 | 0.0314 | 0.0609 | 0.1683  | 0.3837  | 0.05% |
| PCB 103                  | 16 | 3.5712 | 0.7673 | 2.5311 | 6.7605  | 17.8788 | 2.18% |
| PCB 104                  | 16 | 0.1077 | 0.0433 | 0.0746 | 0.1911  | 0.4061  | 0.06% |
| PCB 105                  | 16 | 1.5598 | 0.6741 | 0.9734 | 3.6494  | 5.9138  | 0.98% |
| PCB 106                  | 16 | 0.2599 | 0.0963 | 0.1461 | 0.4641  | 1.1327  | 0.15% |
| PCB 107_124              | 16 | 0.2728 | 0.1025 | 0.1557 | 0.4895  | 1.2469  | 0.17% |
| PCB 109                  | 16 | 0.4418 | 0.0969 | 0.2831 | 0.5205  | 1.1755  | 0.18% |
| PCB 110_115              | 16 | 1.6902 | 0.8111 | 1.3357 | 2.7055  | 5.8980  | 0.87% |
| PCB 111                  | 16 | 0.1959 | 0.0698 | 0.1085 | 0.2831  | 0.6606  | 0.10% |
| PCB 112                  | 16 | 0.1924 | 0.0714 | 0.1172 | 0.2836  | 0.6348  | 0.10% |
| PCB 114                  | 16 | 0.6606 | 0.1942 | 0.4636 | 0.9862  | 2.5714  | 0.34% |
| PCB 118                  | 16 | 7.1633 | 2.3704 | 3.7654 | 16.4031 | 26.9841 | 4.26% |
| PCB 120                  | 16 | 0.1968 | 0.0698 | 0.1080 | 0.2857  | 0.6652  | 0.10% |

|                     |    |         |        |        |         |          |       |
|---------------------|----|---------|--------|--------|---------|----------|-------|
| PCB 121             | 16 | 0.1877  | 0.0704 | 0.1127 | 0.2698  | 0.6318   | 0.09% |
| PCB 122             | 16 | 0.2827  | 0.1094 | 0.1661 | 0.5299  | 1.3327   | 0.17% |
| PCB 123             | 16 | 0.4244  | 0.0992 | 0.3148 | 0.6271  | 1.1592   | 0.20% |
| PCB 126             | 16 | 0.3244  | 0.1025 | 0.1798 | 0.5431  | 1.2980   | 0.17% |
| PCB 127             | 16 | 0.3510  | 0.1040 | 0.1579 | 0.5320  | 1.1592   | 0.17% |
| PCB 128_166         | 16 | 0.3706  | 0.1843 | 0.2594 | 0.5347  | 1.0121   | 0.17% |
| PCB 129_138_160_163 | 16 | 11.0005 | 4.4630 | 8.6478 | 23.6339 | 90.6897  | 8.98% |
| PCB 130             | 16 | 0.4689  | 0.1208 | 0.2255 | 0.7995  | 2.0862   | 0.26% |
| PCB 131             | 16 | 0.1207  | 0.0200 | 0.0560 | 0.2805  | 0.4547   | 0.07% |
| PCB 132             | 16 | 0.6094  | 0.2836 | 0.3578 | 0.7229  | 1.2977   | 0.24% |
| PCB 133             | 16 | 0.2853  | 0.0132 | 0.1316 | 0.3591  | 1.8730   | 0.15% |
| PCB 134_143         | 16 | 0.2617  | 0.0628 | 0.1512 | 0.3116  | 0.5279   | 0.10% |
| PCB 135_151_154     | 16 | 1.1805  | 0.6200 | 1.0368 | 1.5988  | 3.3721   | 0.57% |
| PCB 136             | 16 | 0.4123  | 0.1367 | 0.2317 | 0.5008  | 1.6472   | 0.19% |
| PCB 137             | 16 | 0.7609  | 0.2106 | 0.4120 | 1.1876  | 5.8413   | 0.52% |
| PCB 139_140         | 16 | 0.1473  | 0.0448 | 0.0841 | 0.2546  | 0.4113   | 0.07% |
| PCB 141             | 16 | 0.4179  | 0.2061 | 0.3058 | 0.5111  | 0.7605   | 0.17% |
| PCB 142             | 16 | 0.1250  | 0.0139 | 0.0582 | 0.2879  | 0.4623   | 0.07% |
| PCB 144             | 16 | 0.1727  | 0.0142 | 0.0995 | 0.2261  | 0.3721   | 0.07% |
| PCB 145             | 16 | 0.0598  | 0.0062 | 0.0235 | 0.1515  | 0.2510   | 0.04% |
| PCB 146             | 16 | 1.3931  | 0.2980 | 0.6771 | 2.1197  | 12.5397  | 1.01% |
| PCB 147_149         | 16 | 1.9131  | 0.8918 | 1.1932 | 2.3382  | 4.2093   | 0.78% |
| PCB 148             | 16 | 0.0782  | 0.0100 | 0.0314 | 0.1949  | 0.3388   | 0.05% |
| PCB 150             | 16 | 0.0629  | 0.0058 | 0.0181 | 0.1437  | 0.2408   | 0.03% |
| PCB 152             | 16 | 0.0550  | 0.0096 | 0.0219 | 0.1391  | 0.2347   | 0.03% |
| PCB 153_168         | 16 | 12.7272 | 3.8030 | 6.9273 | 23.9825 | 127.6190 | 9.72% |
| PCB 155             | 16 | 0.0815  | 0.0059 | 0.0315 | 0.1376  | 0.2878   | 0.04% |
| PCB 156_157         | 16 | 2.2747  | 0.4212 | 0.9942 | 4.1384  | 19.5238  | 1.54% |
| PCB 158             | 16 | 0.4650  | 0.2491 | 0.3229 | 0.6031  | 1.7931   | 0.22% |
| PCB 159             | 16 | 0.0927  | 0.0214 | 0.0629 | 0.2030  | 0.3434   | 0.05% |
| PCB 161             | 16 | 0.0883  | 0.0131 | 0.0355 | 0.2033  | 0.3226   | 0.05% |
| PCB 162             | 16 | 0.1072  | 0.0106 | 0.0657 | 0.2069  | 0.3472   | 0.05% |
| PCB 164             | 16 | 0.1649  | 0.0099 | 0.0515 | 0.2200  | 0.3472   | 0.06% |
| PCB 165             | 16 | 0.0966  | 0.0108 | 0.0432 | 0.2217  | 0.3660   | 0.05% |
| PCB 167             | 16 | 0.7301  | 0.0094 | 0.2997 | 1.2905  | 3.6667   | 0.42% |
| PCB 169             | 16 | 0.1154  | 0.0428 | 0.0664 | 0.2389  | 0.3415   | 0.06% |
| PCB 170             | 16 | 2.3440  | 0.9167 | 1.1202 | 4.8376  | 28.4127  | 1.90% |
| PCB 171_173         | 16 | 0.3593  | 0.0818 | 0.2156 | 0.7882  | 3.2857   | 0.27% |
| PCB 172             | 16 | 0.2702  | 0.0222 | 0.1410 | 0.7815  | 4.3175   | 0.27% |
| PCB 174             | 16 | 0.3920  | 0.2056 | 0.2914 | 0.5850  | 0.8259   | 0.18% |
| PCB 175             | 16 | 0.0910  | 0.0272 | 0.0460 | 0.1888  | 0.3638   | 0.05% |
| PCB 176             | 16 | 0.0913  | 0.0207 | 0.0620 | 0.1255  | 0.2000   | 0.04% |
| PCB 177             | 16 | 0.6257  | 0.2655 | 0.4136 | 1.3289  | 3.9828   | 0.46% |
| PCB 178             | 16 | 0.4960  | 0.1281 | 0.2344 | 1.1006  | 5.9683   | 0.44% |
| PCB 179             | 16 | 0.2717  | 0.1194 | 0.2018 | 0.3898  | 0.6132   | 0.12% |
| PCB 180_193         | 16 | 6.3136  | 1.7424 | 3.0562 | 15.8356 | 80.7936  | 5.58% |

|             |    |        |        |        |        |         |       |
|-------------|----|--------|--------|--------|--------|---------|-------|
| PCB 181     | 16 | 0.0607 | 0.0117 | 0.0389 | 0.0977 | 0.2571  | 0.03% |
| PCB 182     | 16 | 0.0638 | 0.0248 | 0.0479 | 0.0975 | 0.2551  | 0.03% |
| PCB 183_185 | 16 | 1.4200 | 0.5479 | 0.7467 | 2.6786 | 12.1207 | 1.15% |
| PCB 184     | 16 | 0.0437 | 0.0056 | 0.0195 | 0.0678 | 0.1761  | 0.02% |
| PCB 186     | 16 | 0.0376 | 0.0060 | 0.0215 | 0.0748 | 0.1961  | 0.02% |
| PCB 187     | 16 | 2.2953 | 0.8076 | 1.1793 | 5.6749 | 22.2222 | 1.96% |
| PCB 188     | 16 | 0.0493 | 0.0071 | 0.0258 | 0.0756 | 0.1680  | 0.02% |
| PCB 189     | 16 | 0.1679 | 0.0268 | 0.0889 | 0.2445 | 1.5032  | 0.11% |
| PCB 190     | 16 | 0.4442 | 0.0572 | 0.2075 | 0.9587 | 4.1429  | 0.33% |
| PCB 191     | 16 | 0.1409 | 0.0189 | 0.0782 | 0.2430 | 1.1635  | 0.10% |
| PCB 192     | 16 | 0.0444 | 0.0074 | 0.0219 | 0.0880 | 0.2347  | 0.03% |
| PCB 194     | 16 | 0.8480 | 0.2698 | 0.5701 | 1.8801 | 11.8571 | 0.98% |
| PCB 195     | 16 | 0.2581 | 0.0779 | 0.1216 | 0.5466 | 2.2381  | 0.21% |
| PCB 196     | 16 | 0.4692 | 0.1435 | 0.2854 | 0.9969 | 4.2381  | 0.43% |
| PCB 197_200 | 16 | 0.0555 | 0.0222 | 0.0339 | 0.0911 | 0.2034  | 0.03% |
| PCB 198_199 | 16 | 1.0954 | 0.2377 | 0.6206 | 2.6857 | 21.2676 | 1.44% |
| PCB 201     | 16 | 0.0859 | 0.0254 | 0.0379 | 0.1902 | 0.4052  | 0.05% |
| PCB 202     | 16 | 0.4219 | 0.0392 | 0.1854 | 0.8542 | 4.8592  | 0.42% |
| PCB 203     | 16 | 0.8336 | 0.0630 | 0.4438 | 1.6297 | 12.5352 | 0.90% |
| PCB 204     | 16 | 0.0249 | 0.0051 | 0.0105 | 0.0372 | 0.1339  | 0.01% |
| PCB 205     | 16 | 0.1166 | 0.0343 | 0.0568 | 0.1763 | 0.3603  | 0.05% |
| PCB 206     | 16 | 0.7545 | 0.2611 | 0.4594 | 1.0021 | 10.8169 | 0.64% |
| PCB 207     | 16 | 0.2520 | 0.0746 | 0.1910 | 0.3721 | 0.8620  | 0.12% |
| PCB 208     | 16 | 0.3451 | 0.1783 | 0.2906 | 0.4591 | 2.8592  | 0.24% |
| PCB 209     | 16 | 0.5851 | 0.2037 | 0.3824 | 0.6976 | 0.9667  | 0.22% |
